# Supplementary material for: Construction of small RNA-mediated gene regulatory networks in the roots of rice (Oryza sativa)
Source: PubMed Central journal article supplement (PMC3734165; doi:10.1186/1471-2164-14-510), 2013-07-27

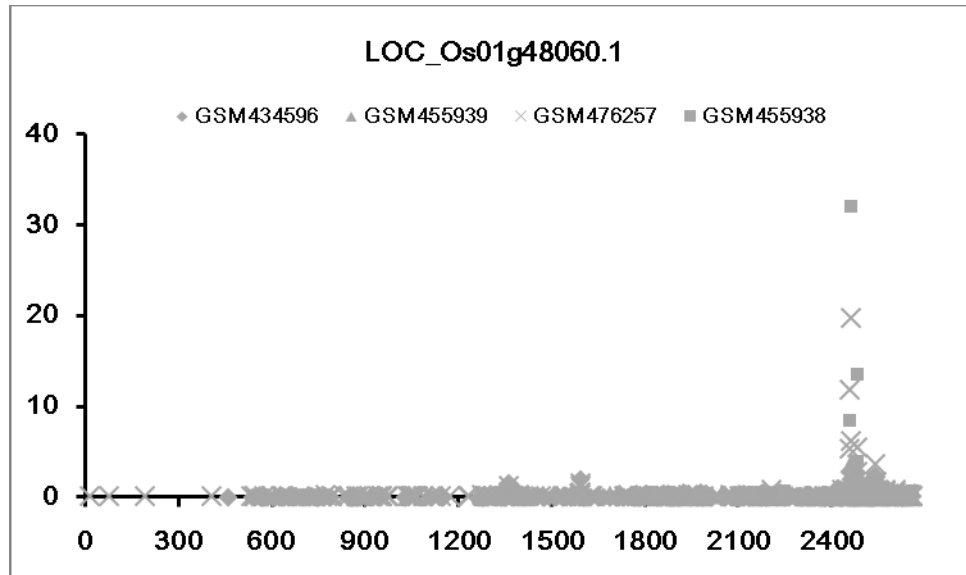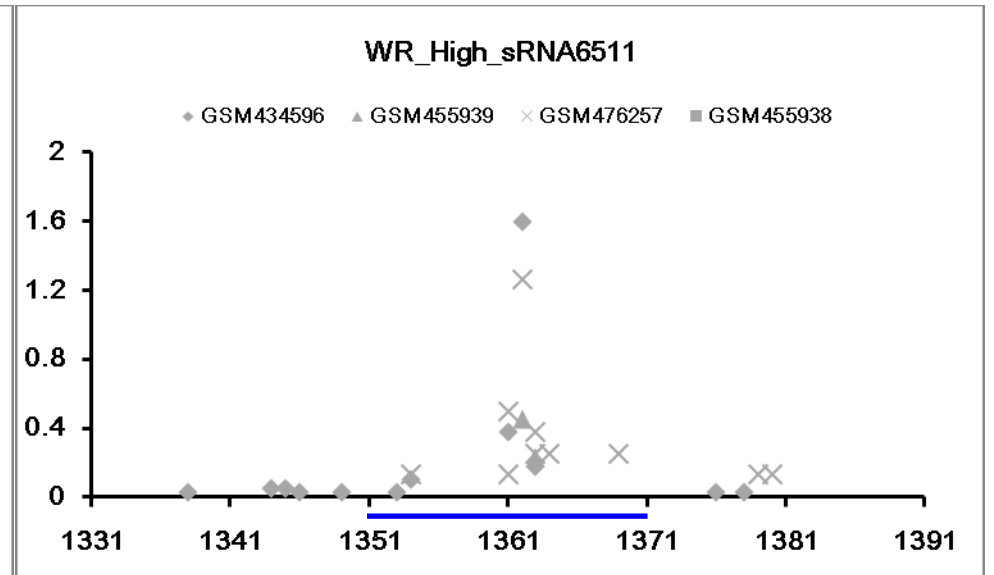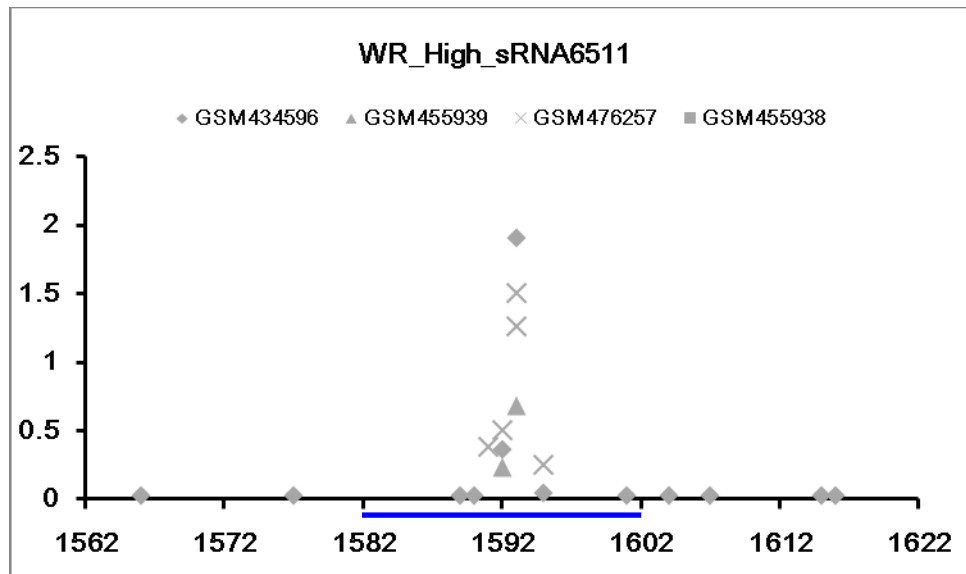

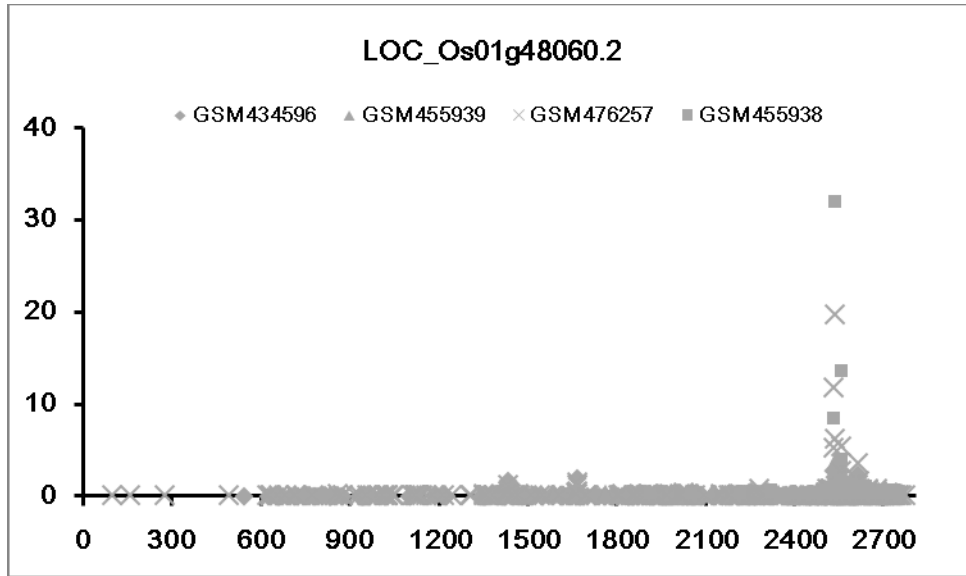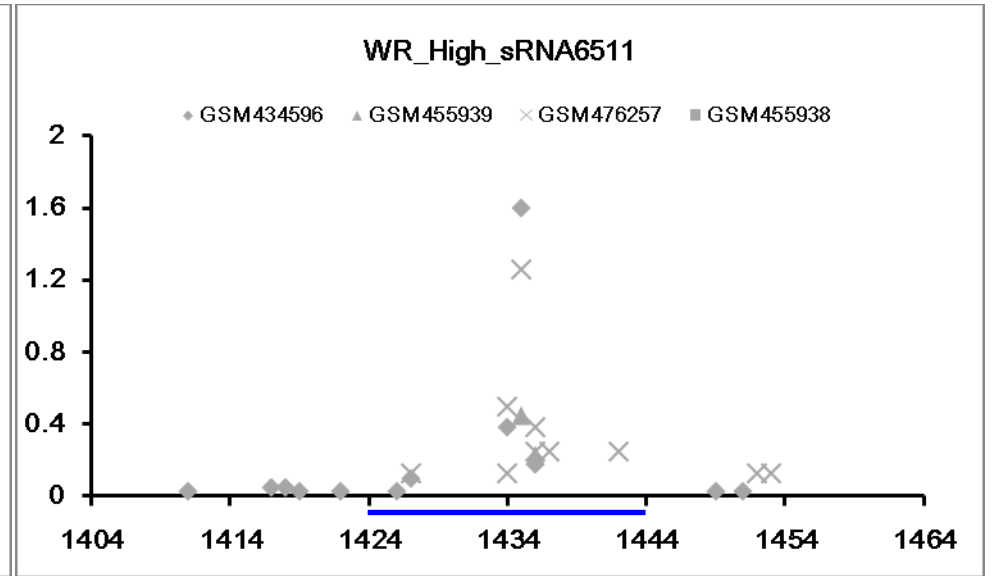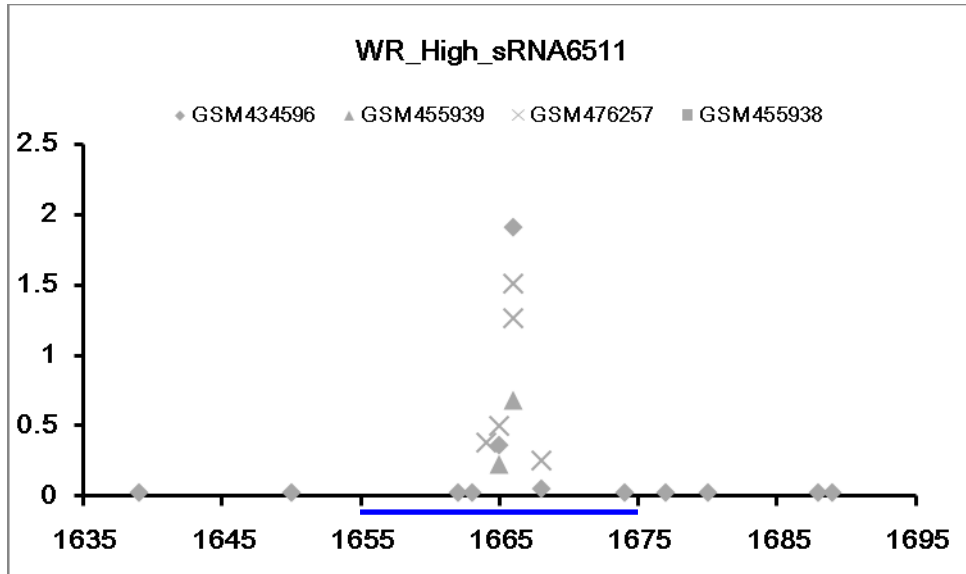

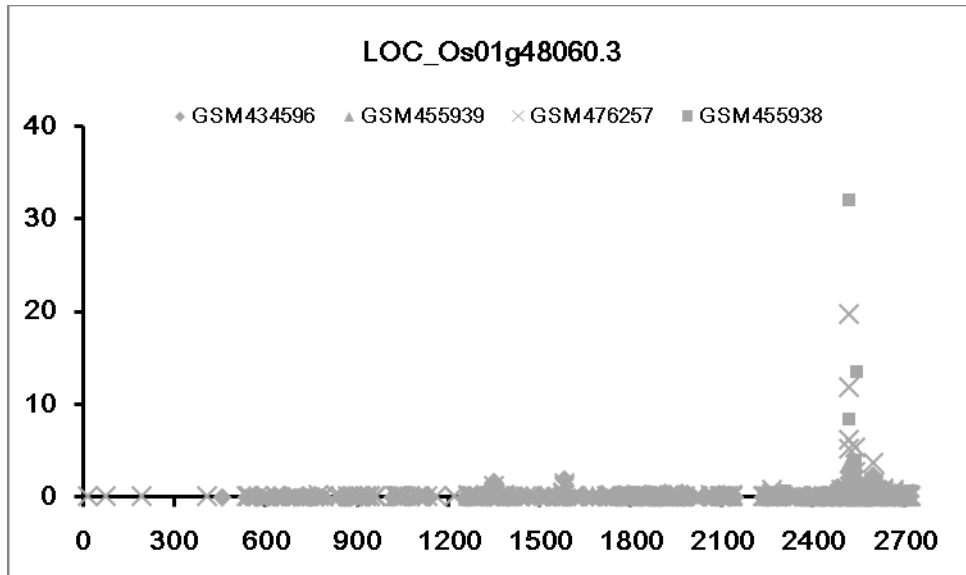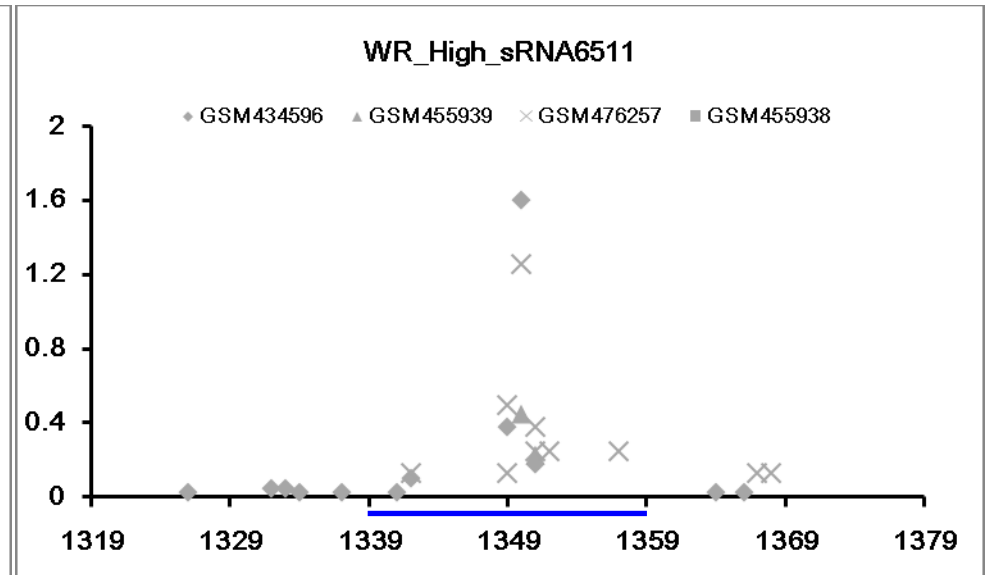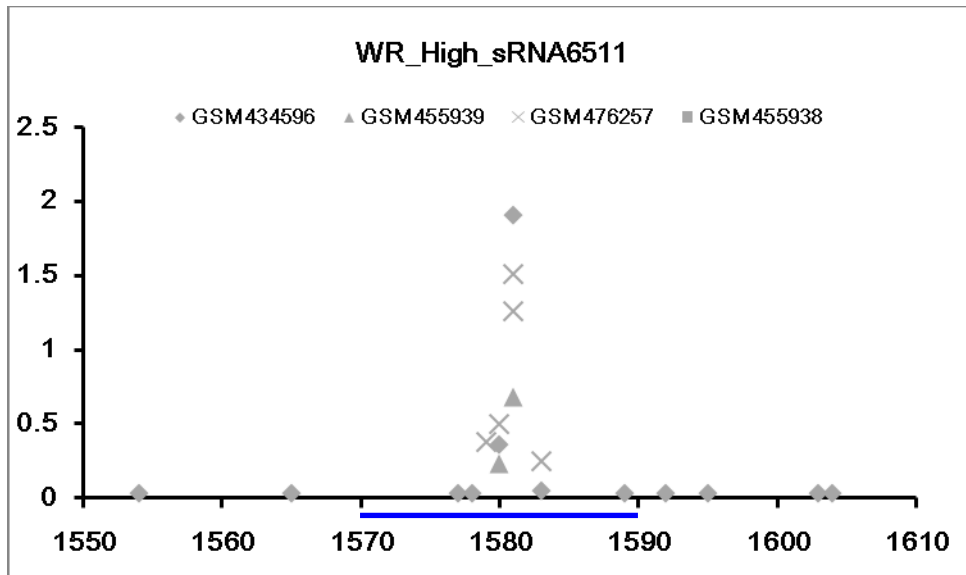

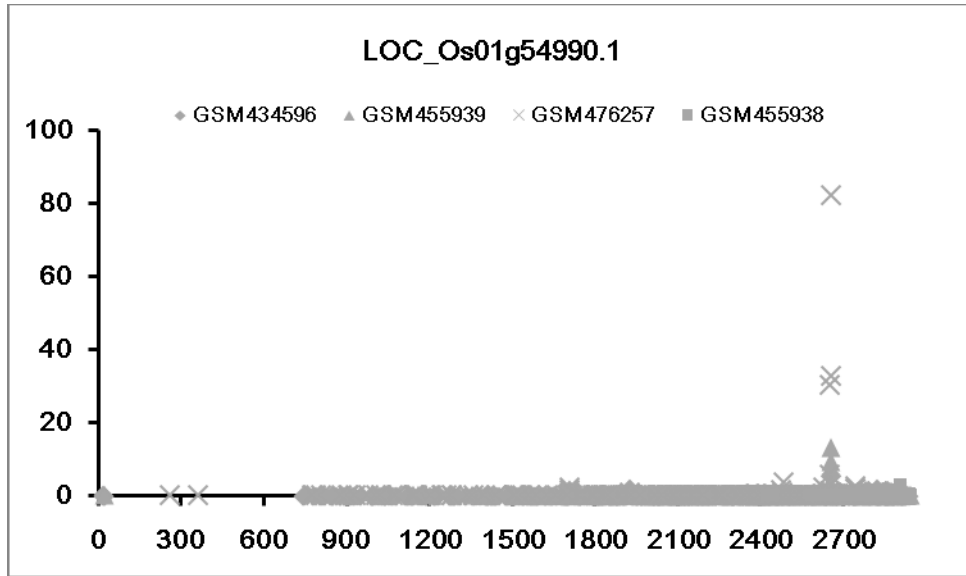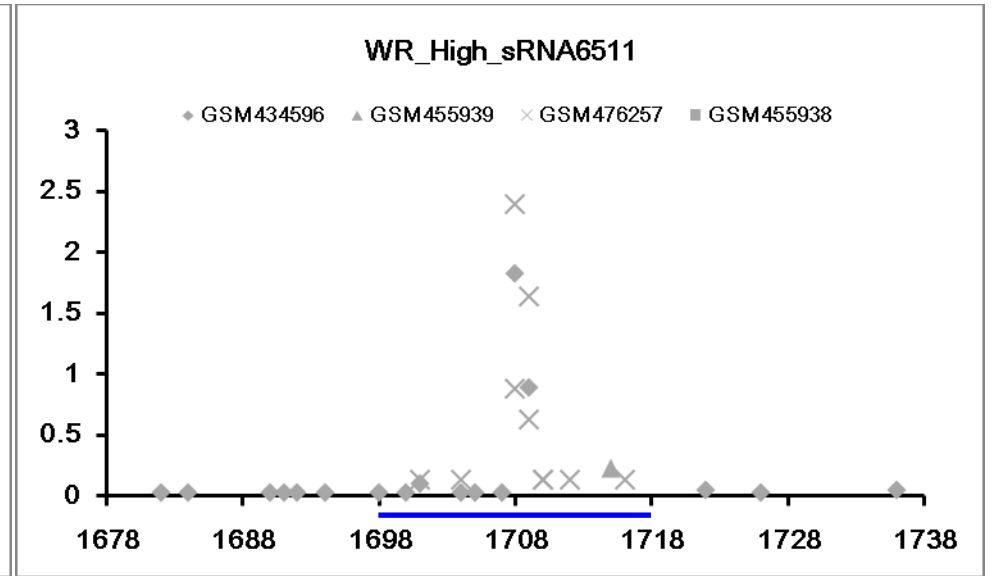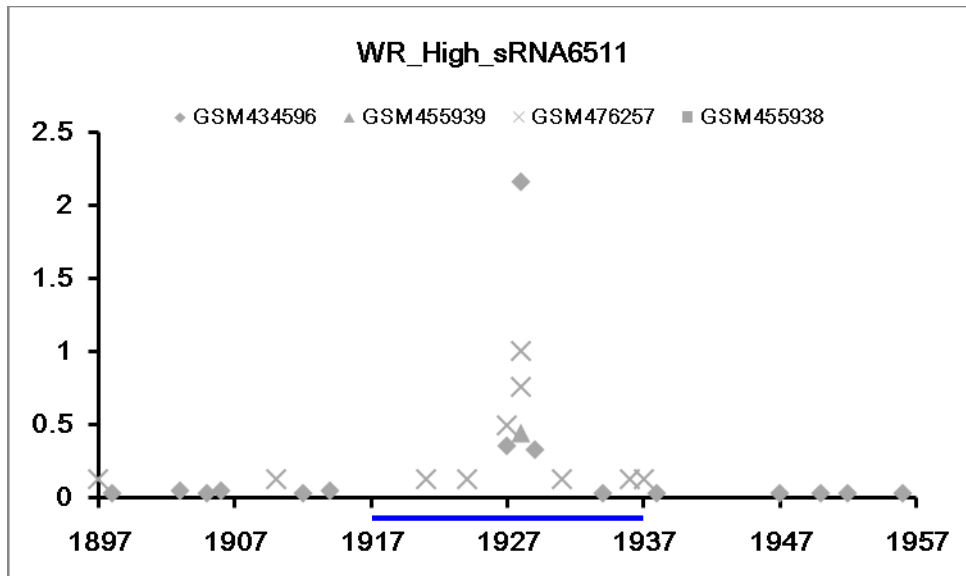

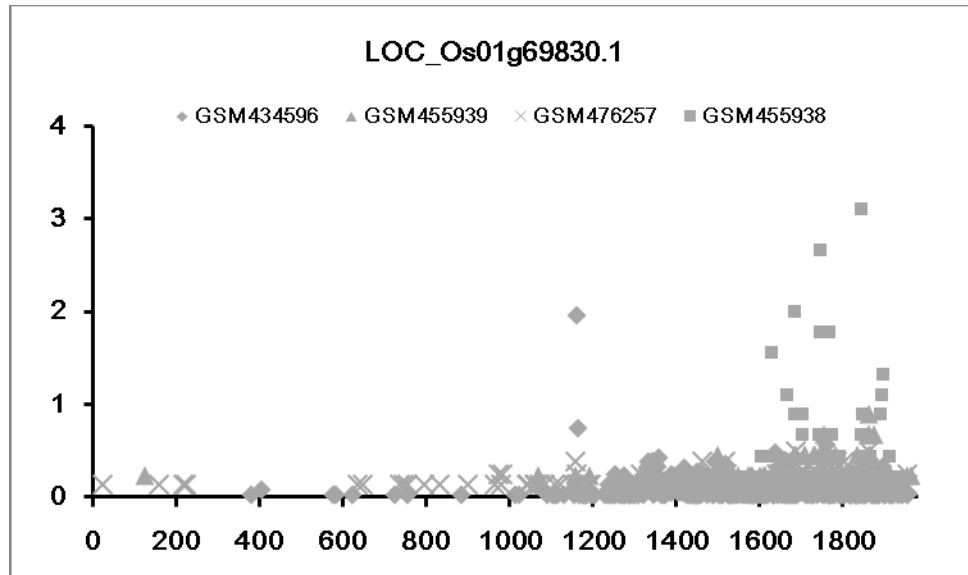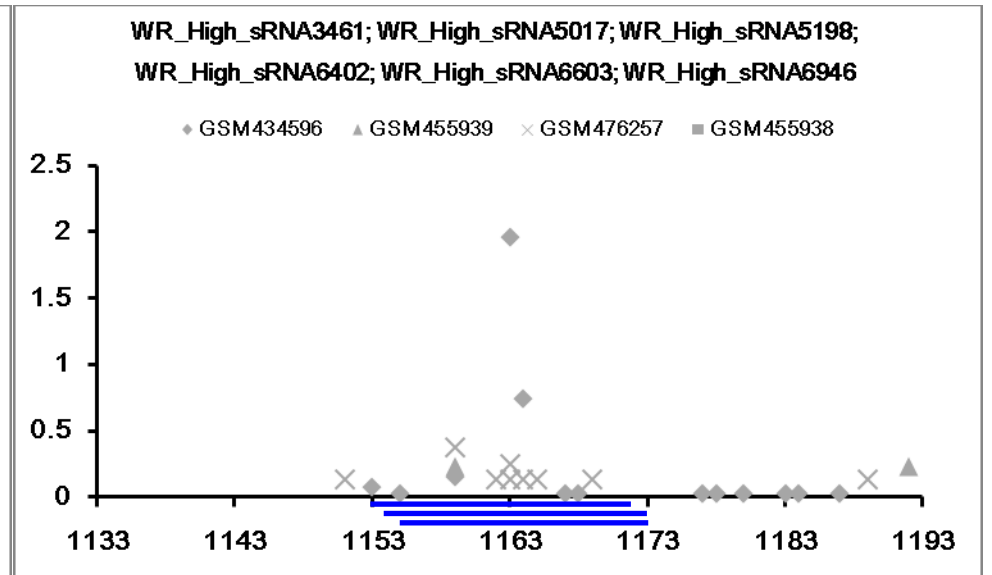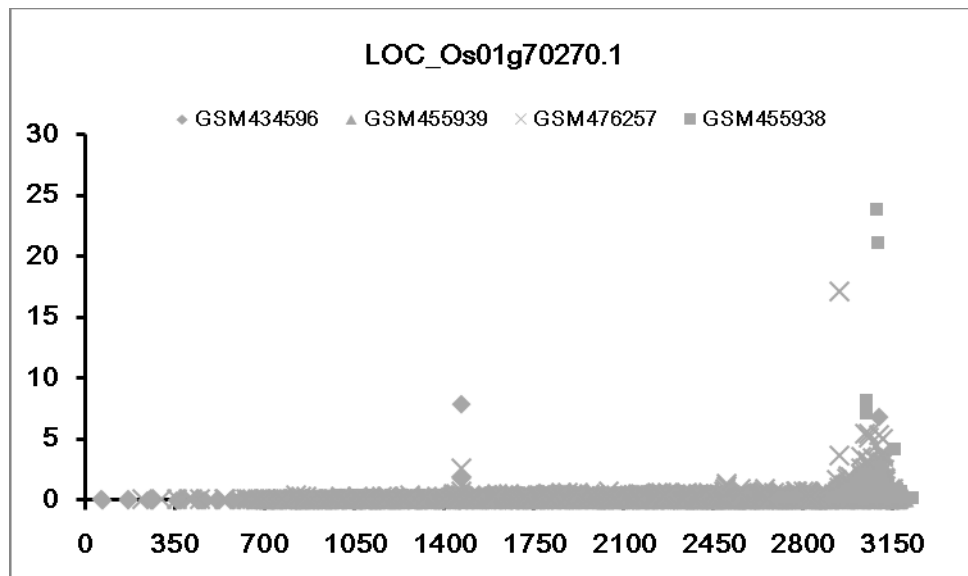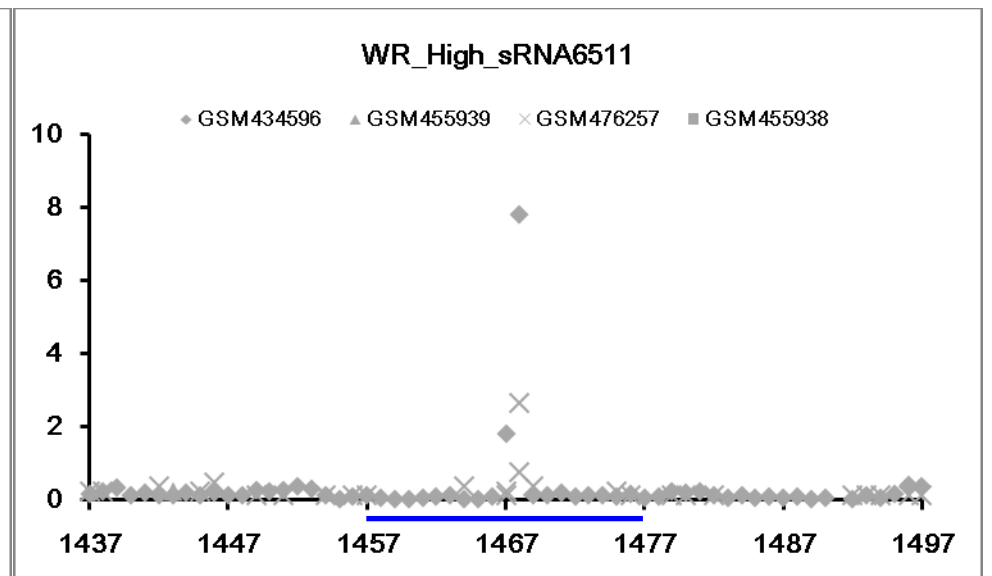

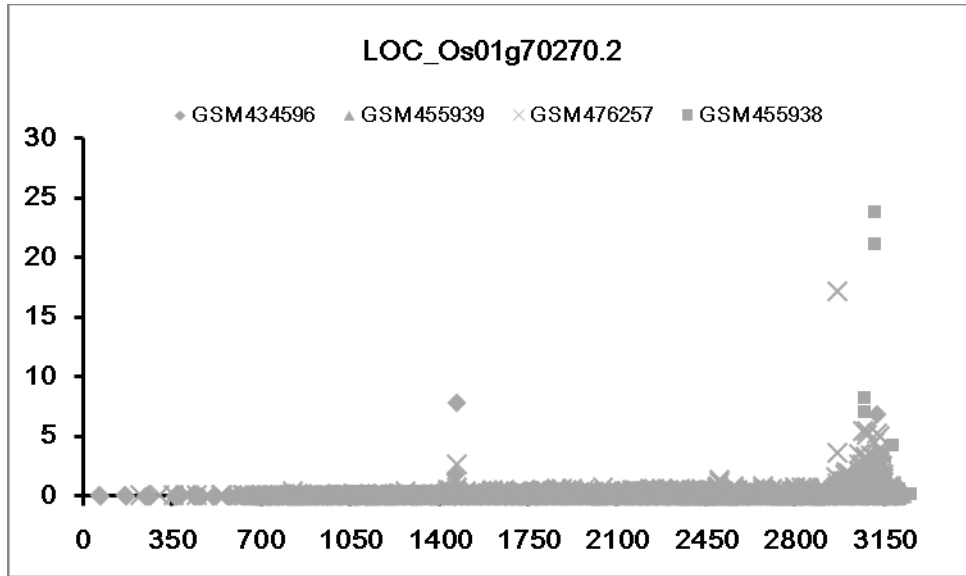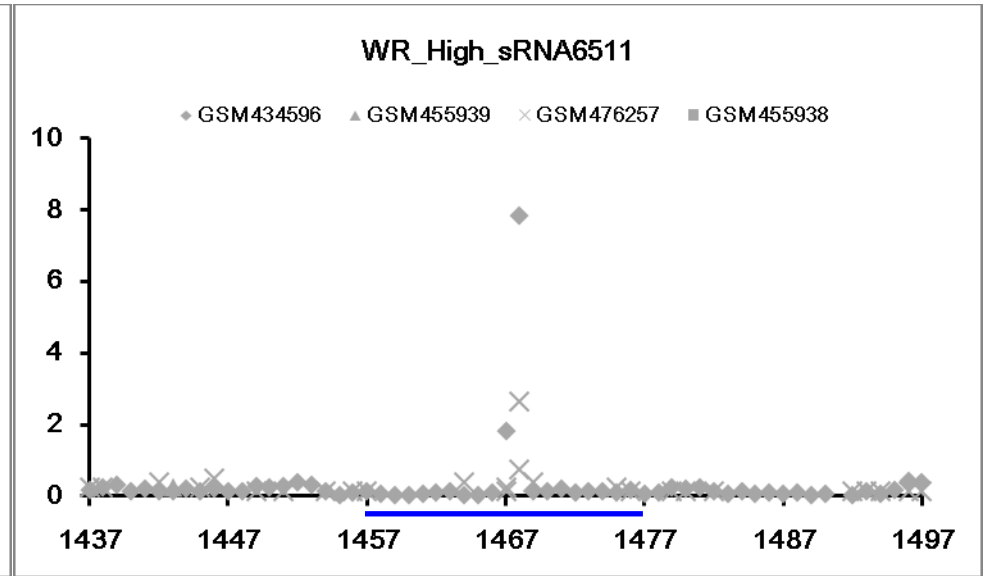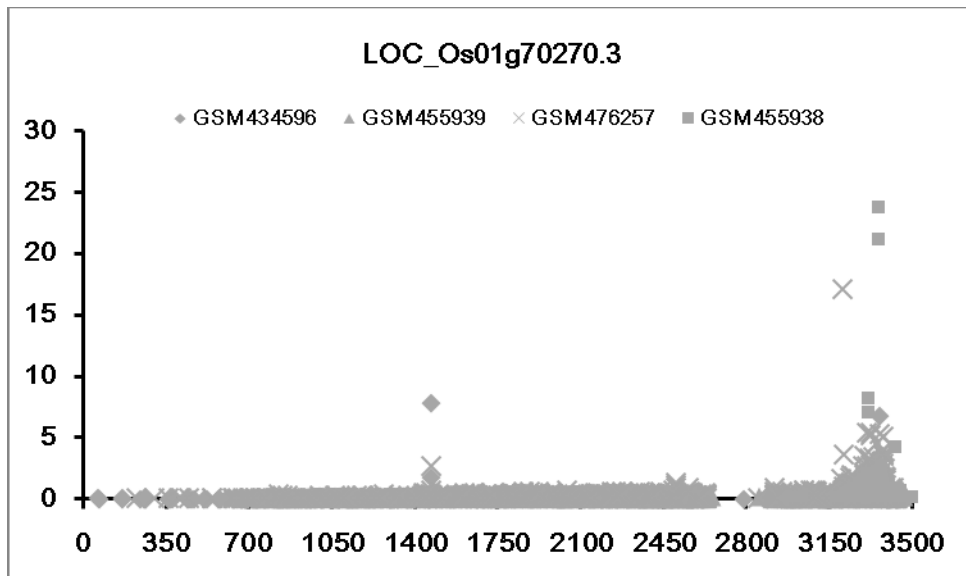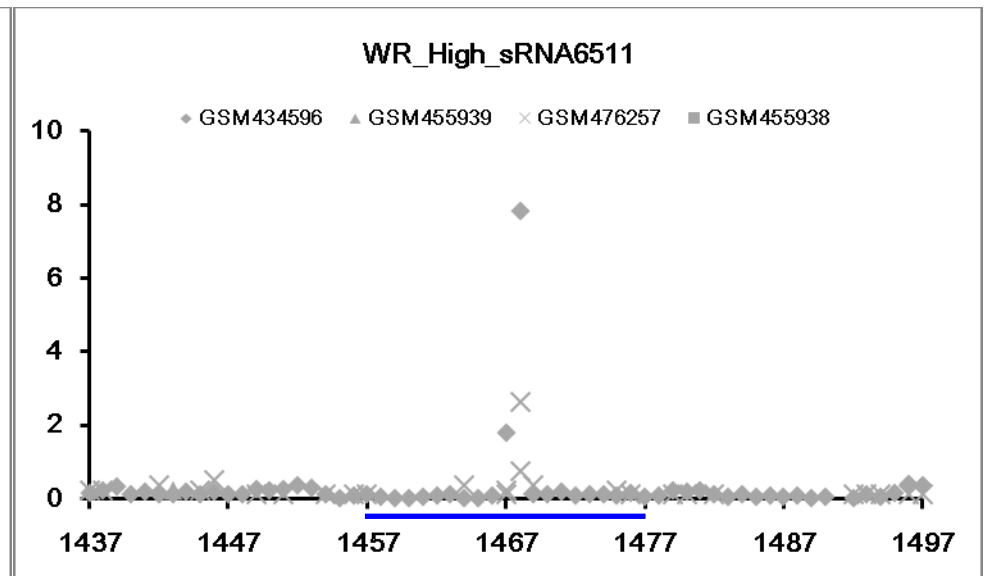

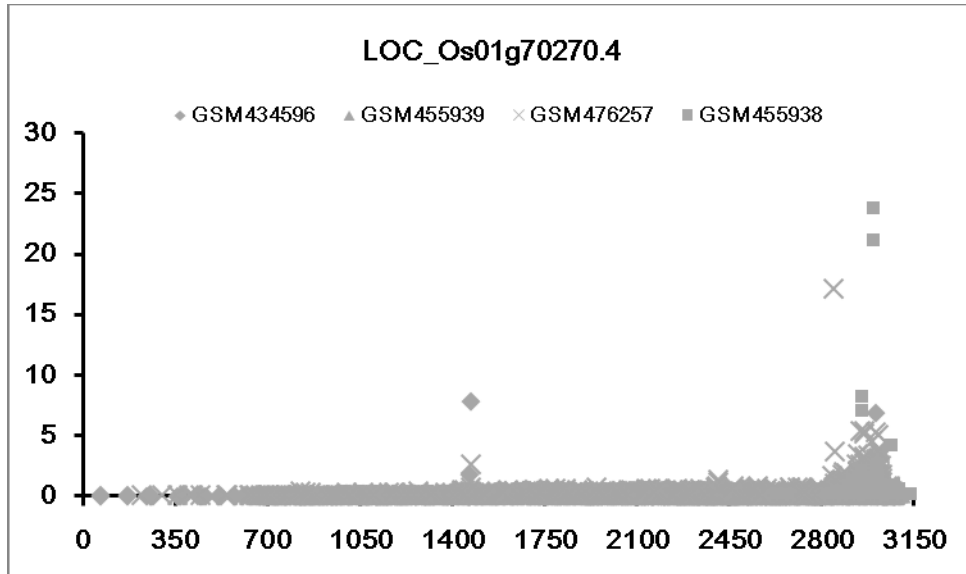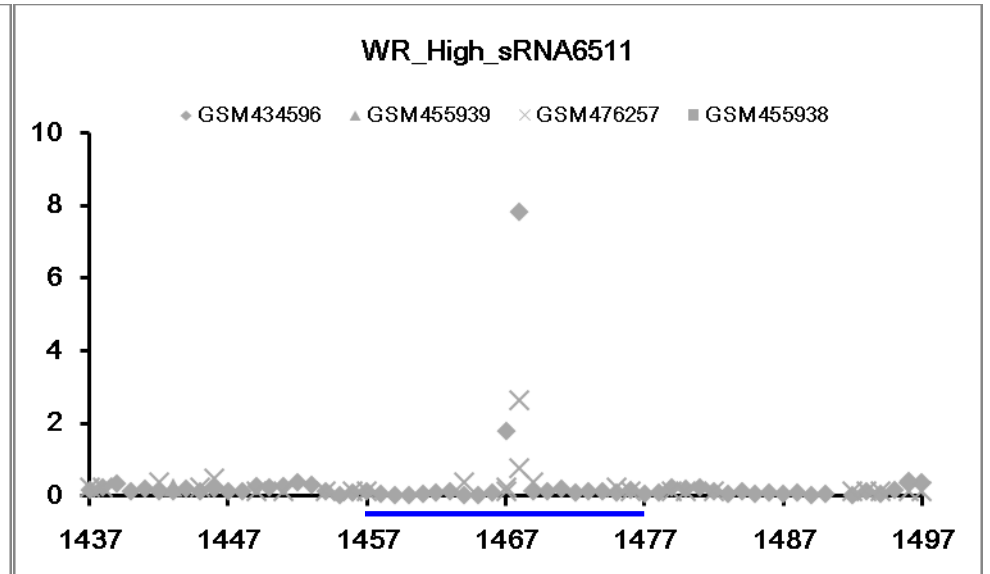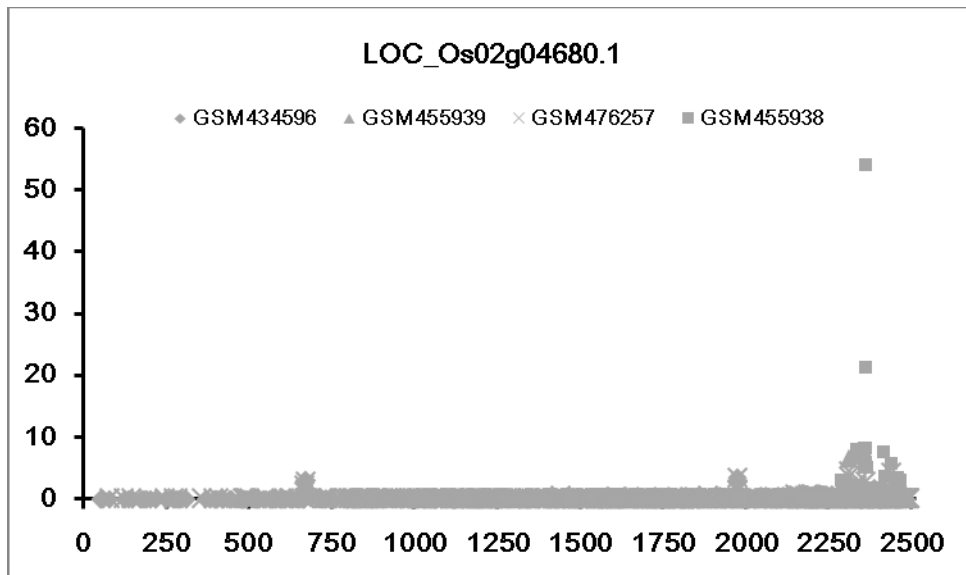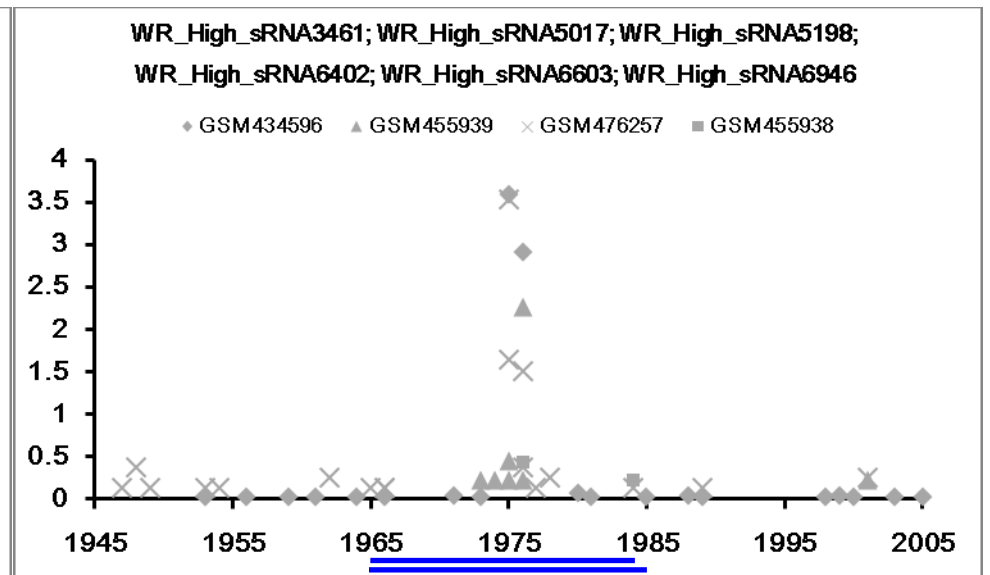

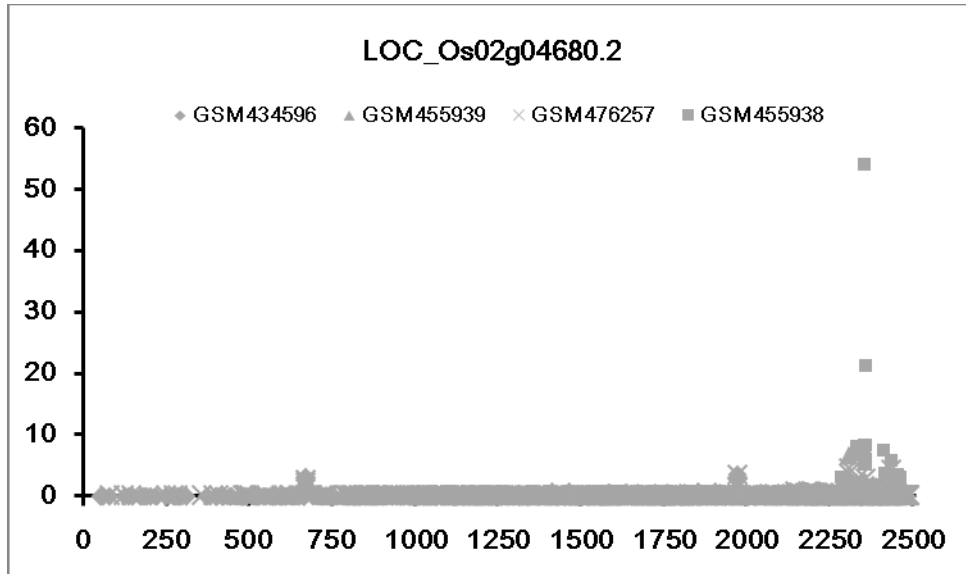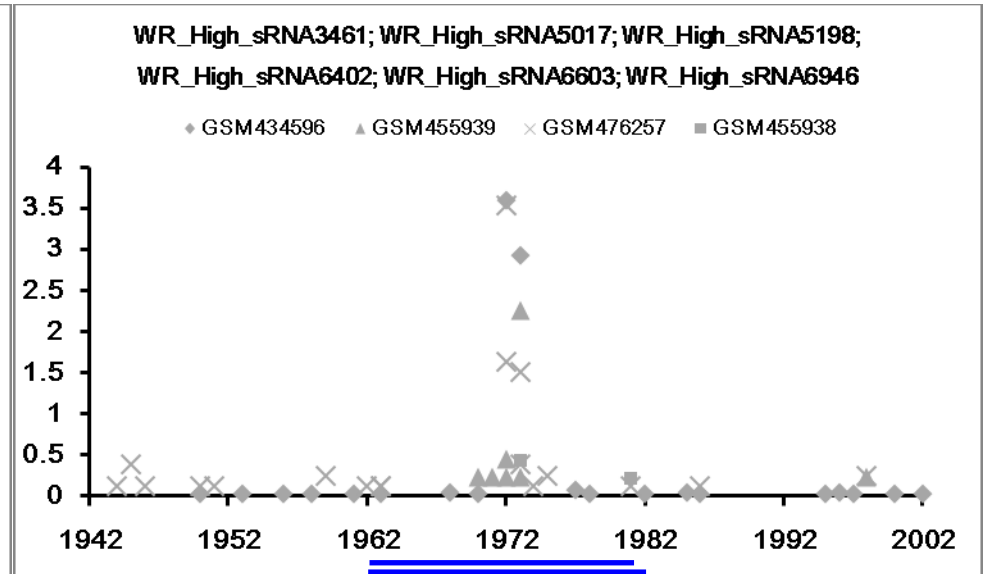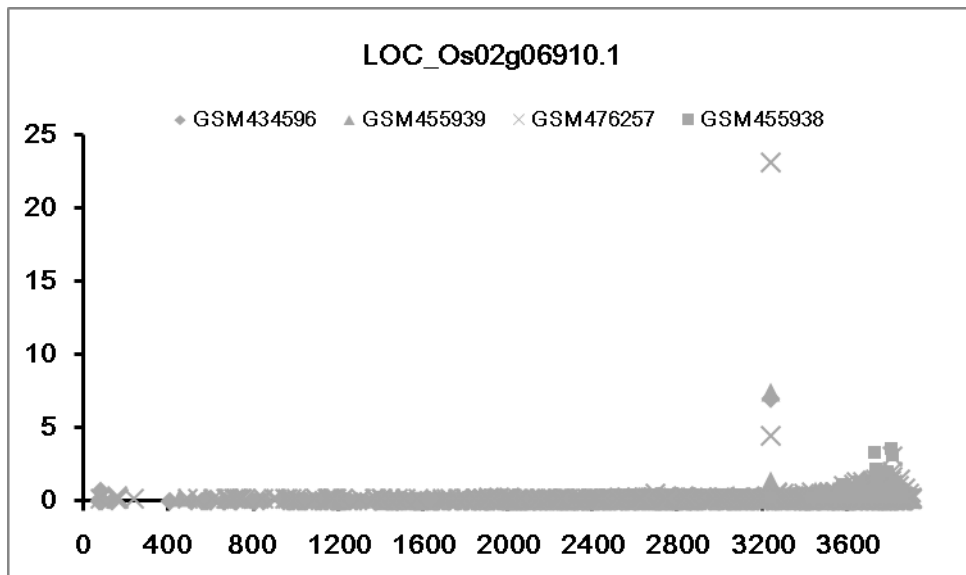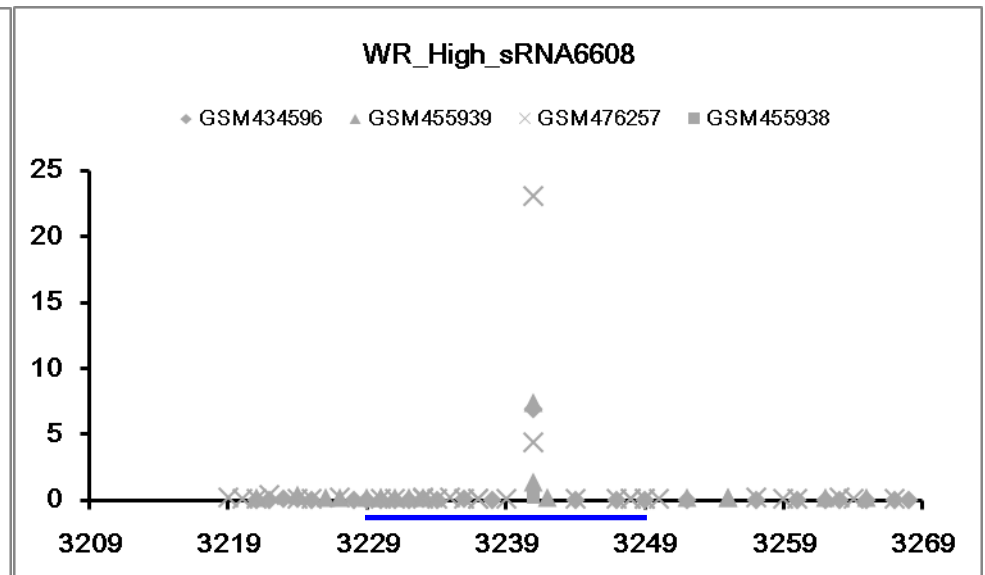



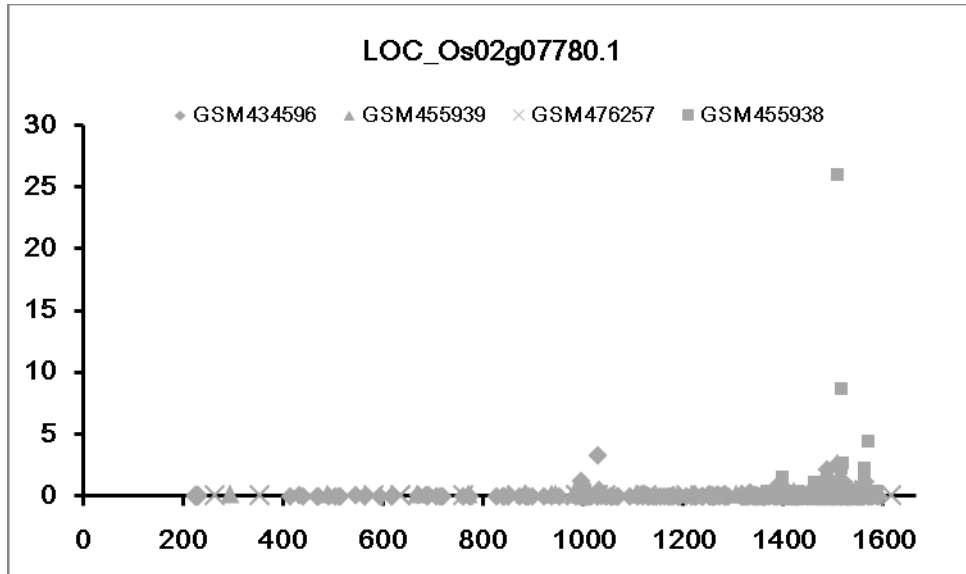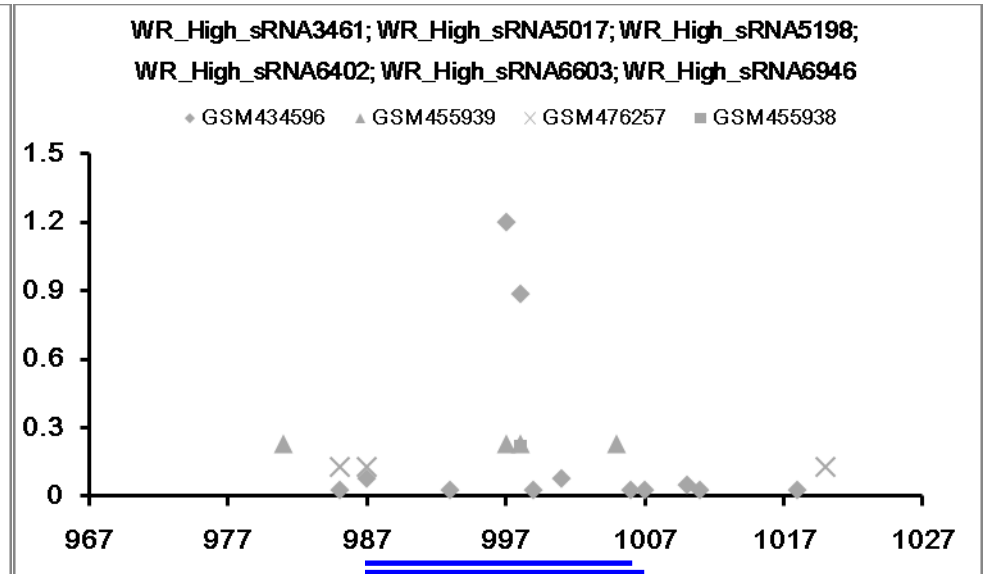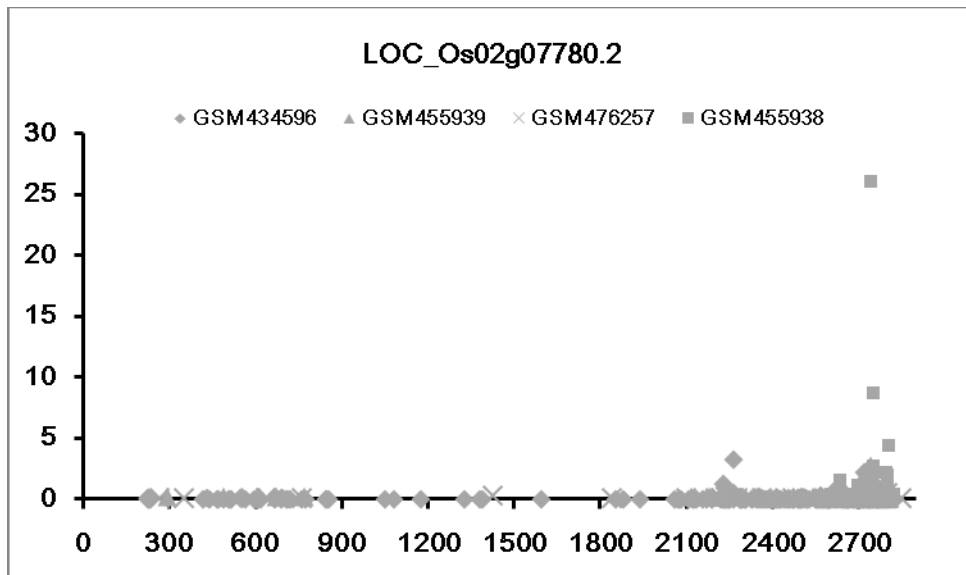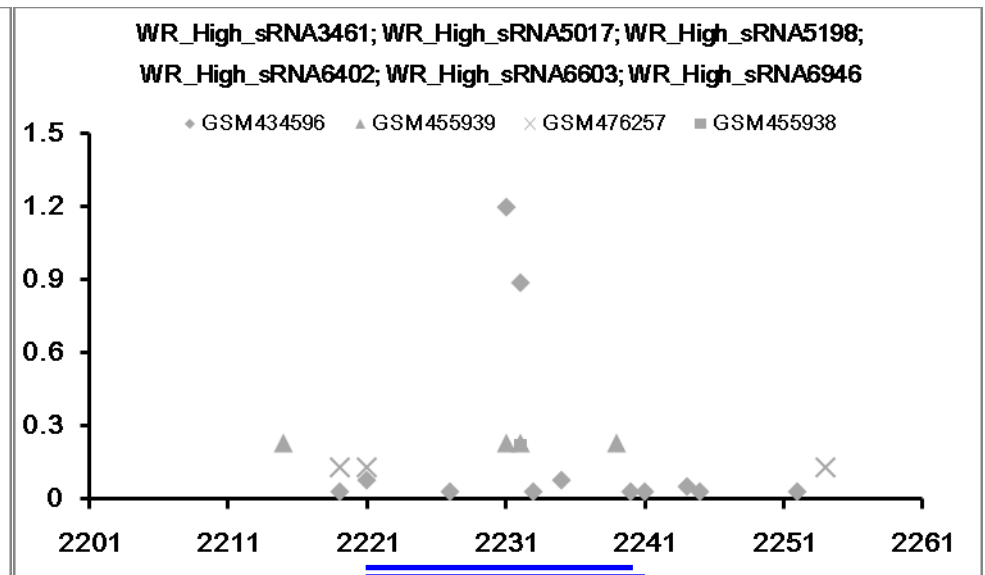

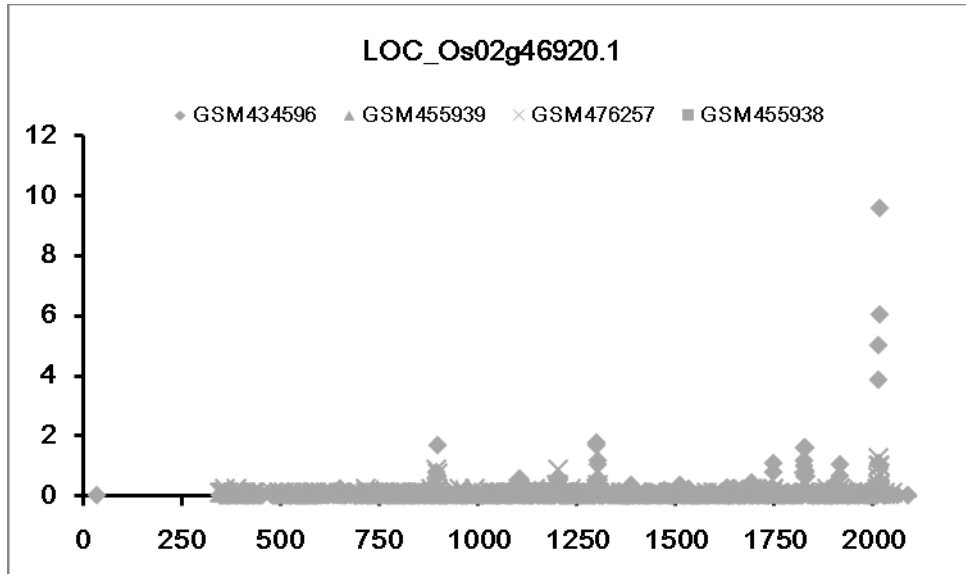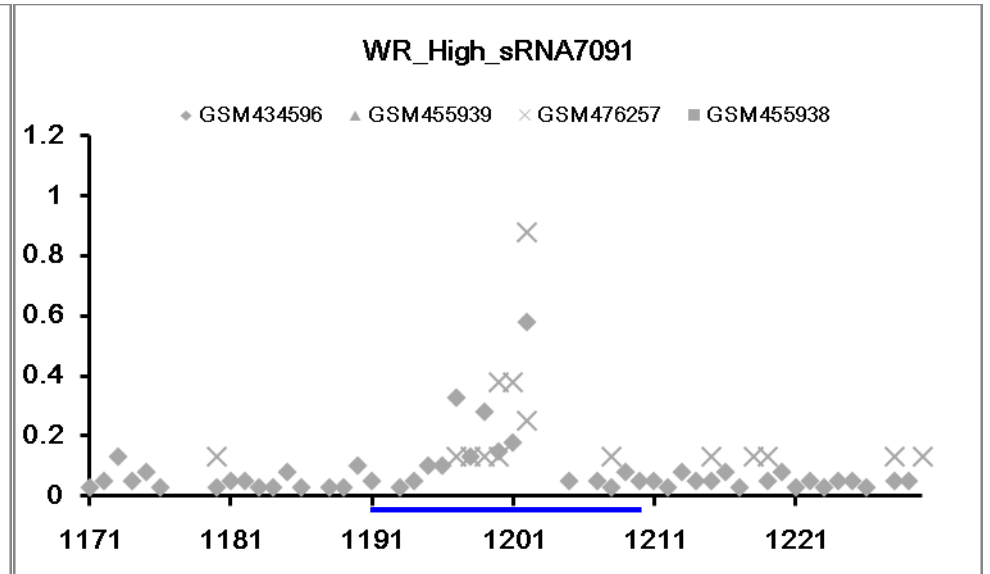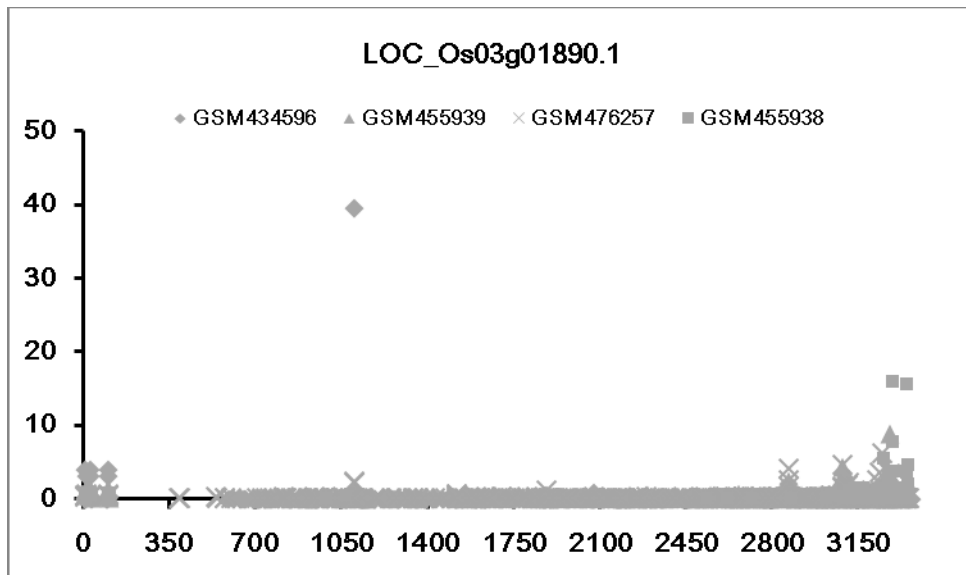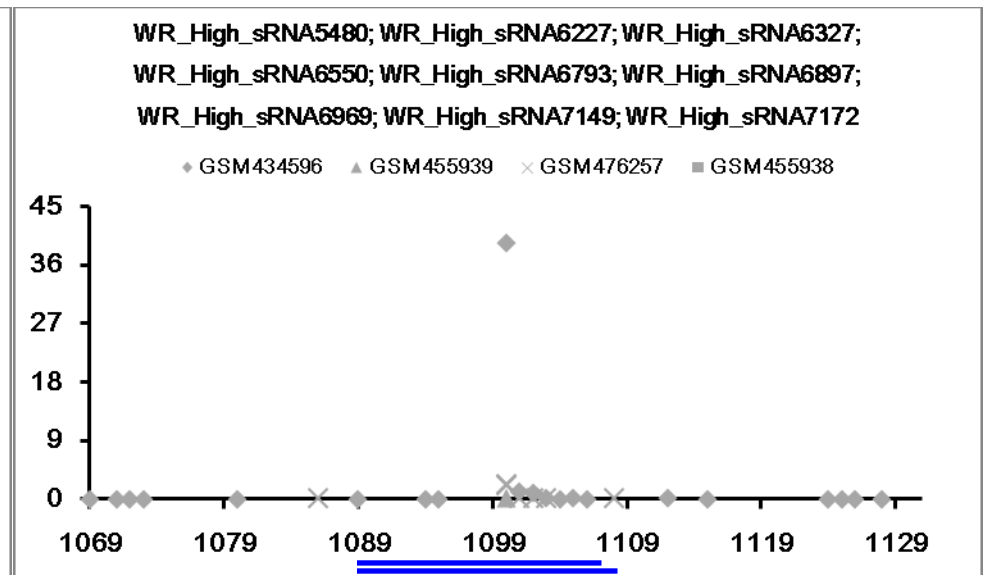

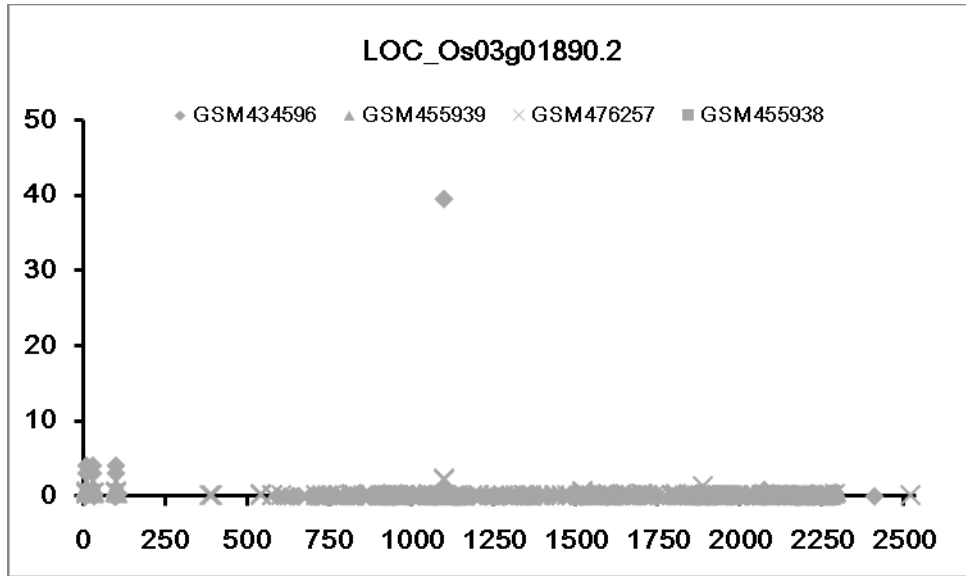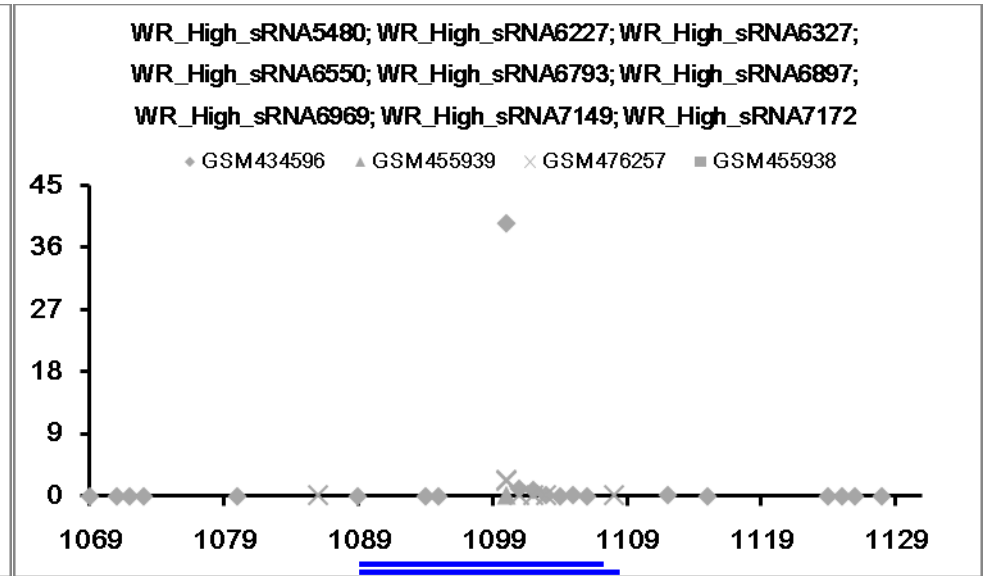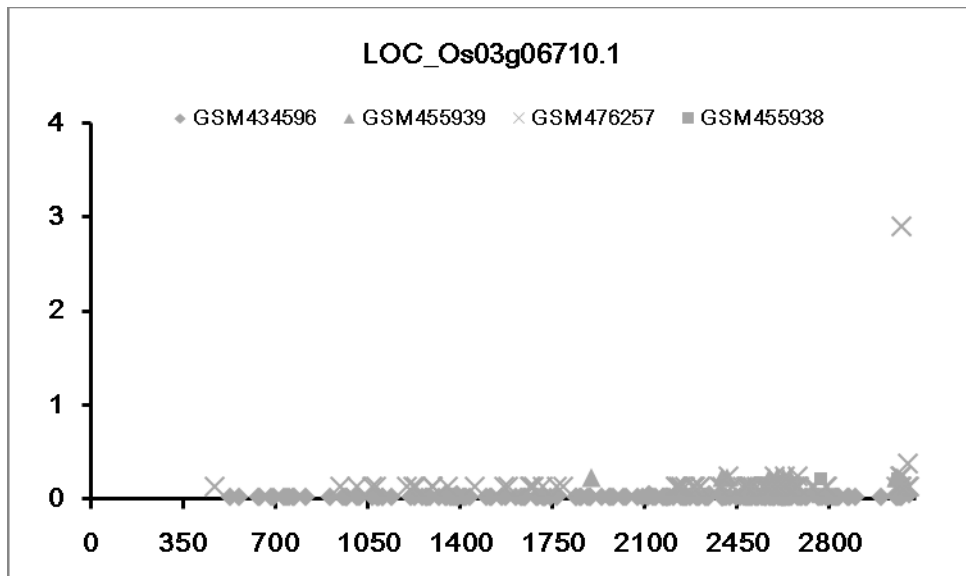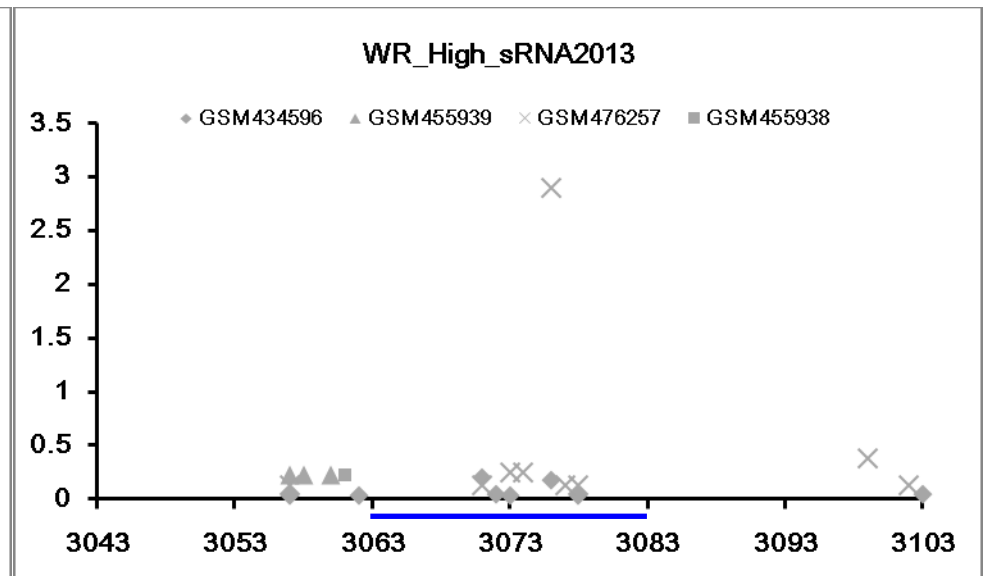

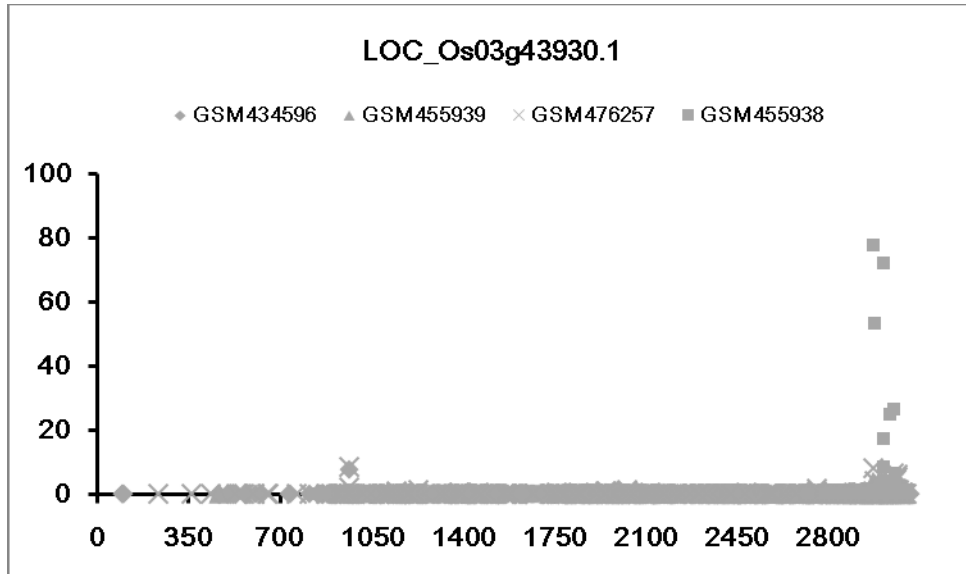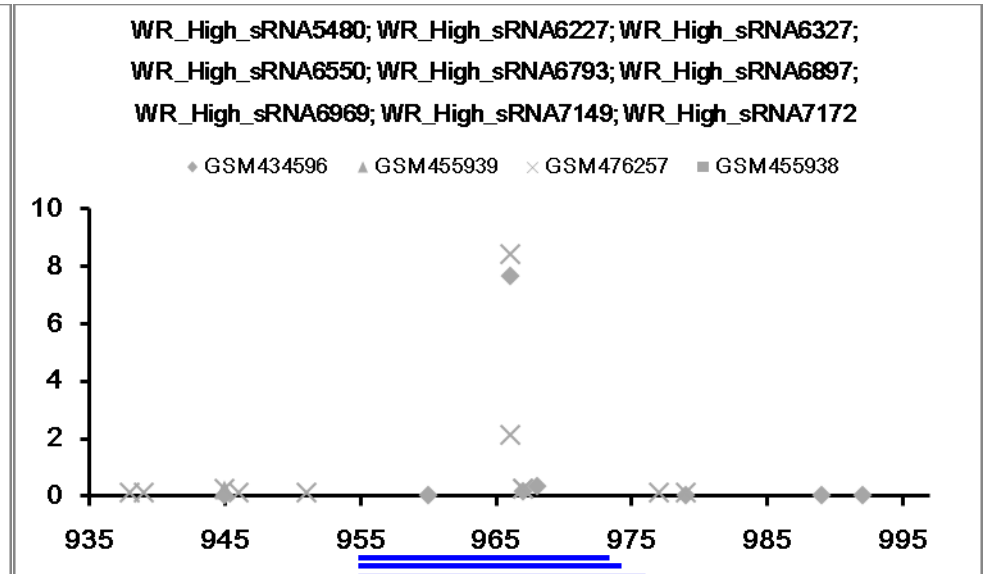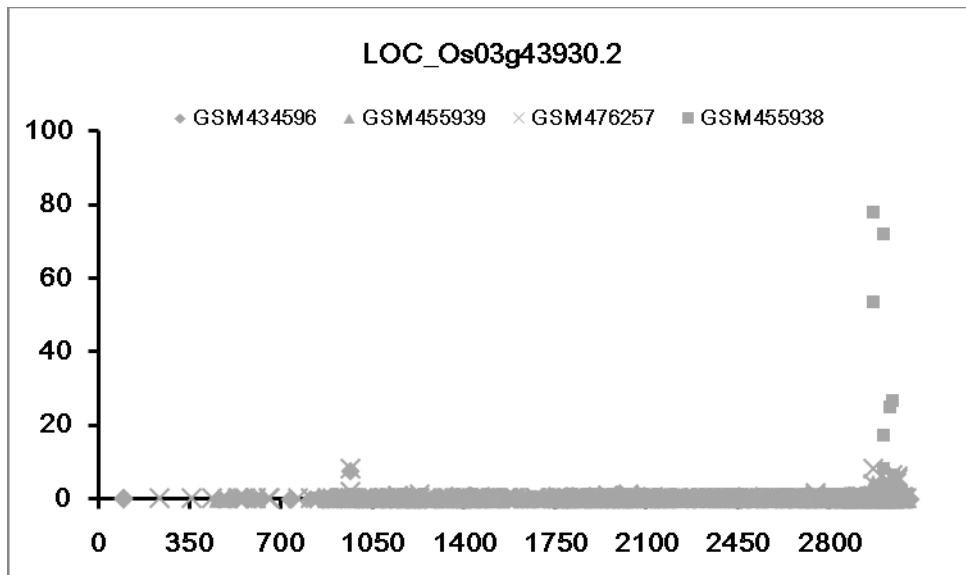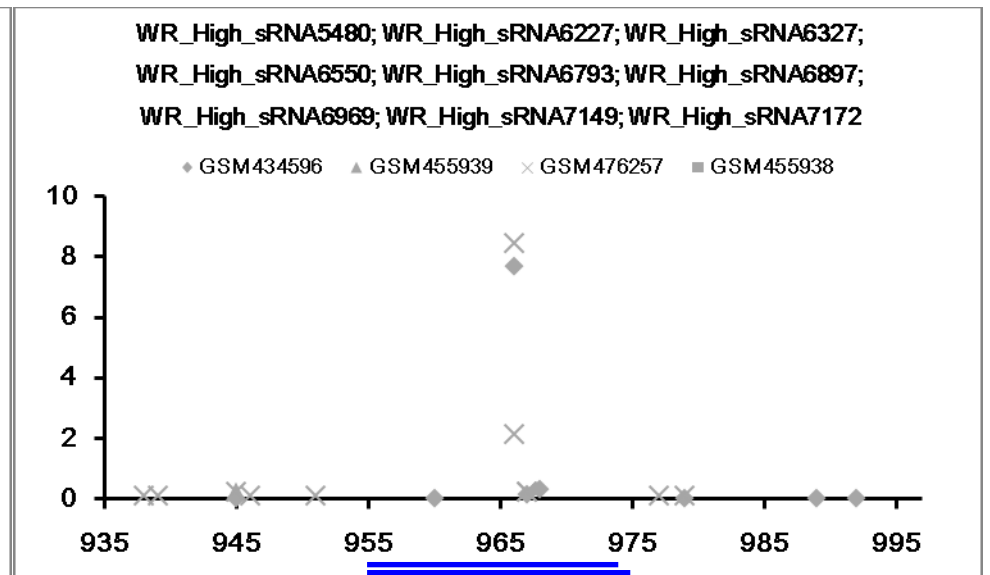

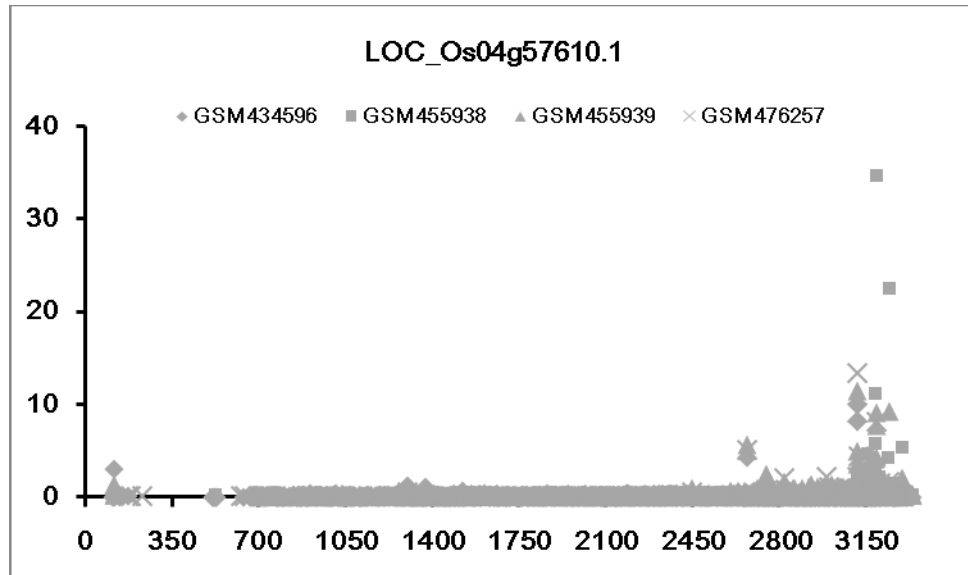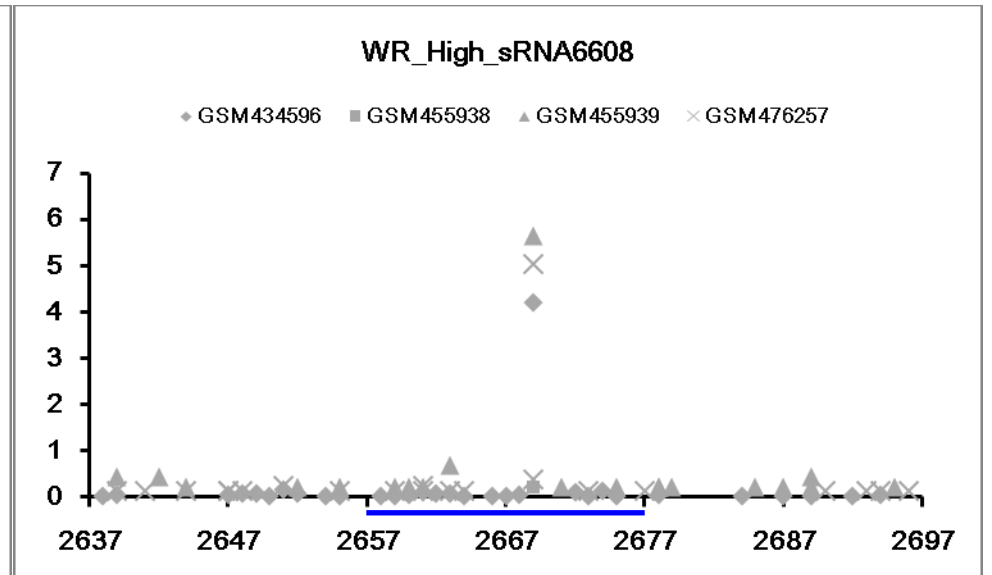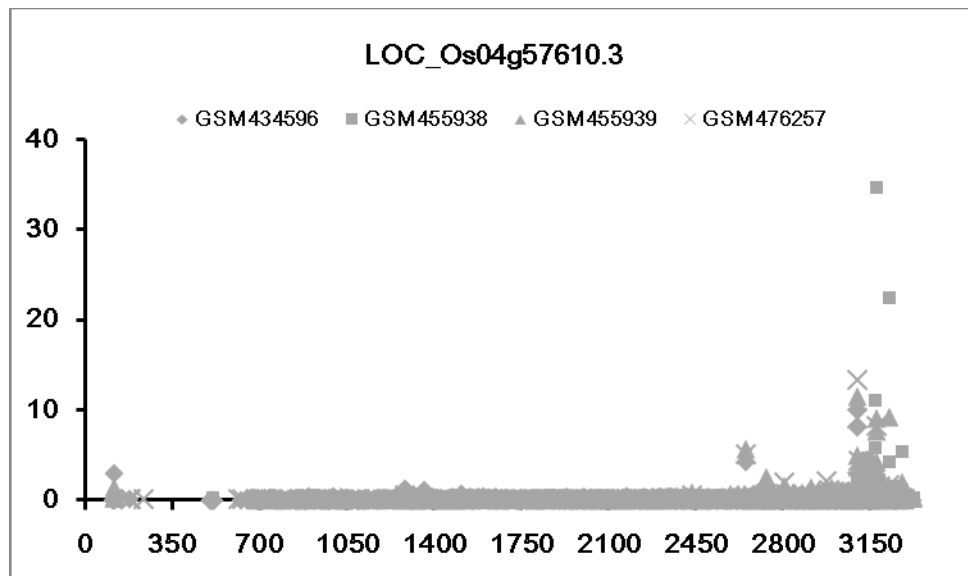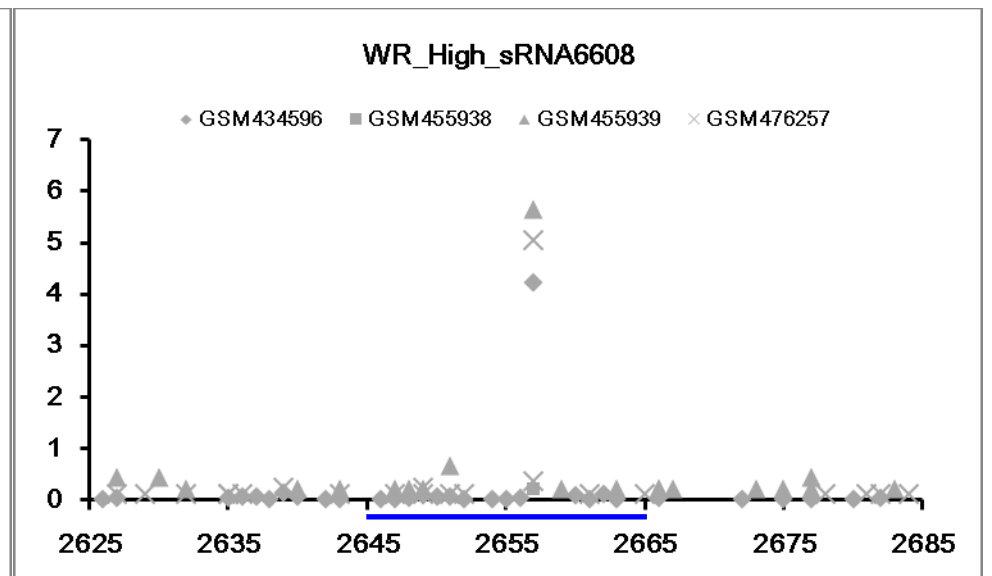

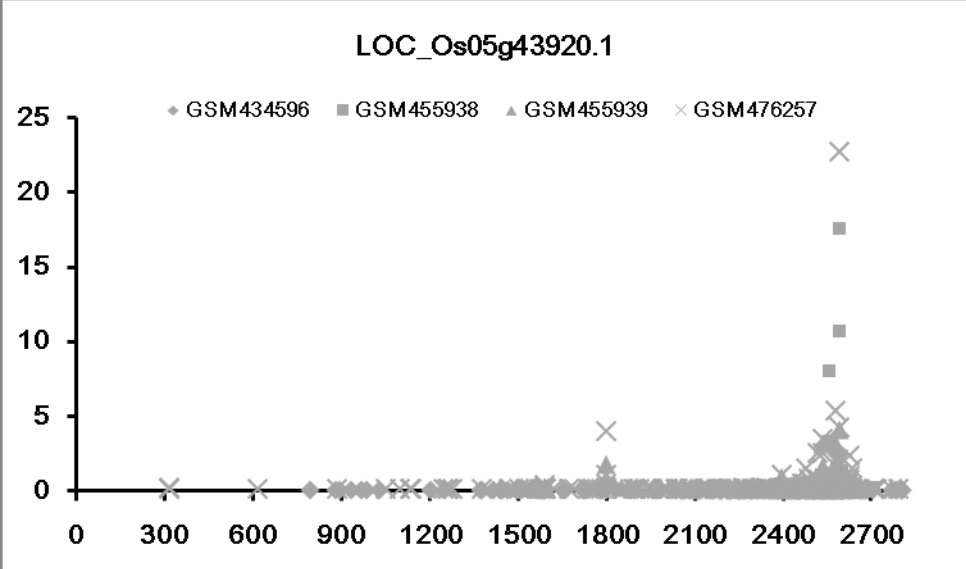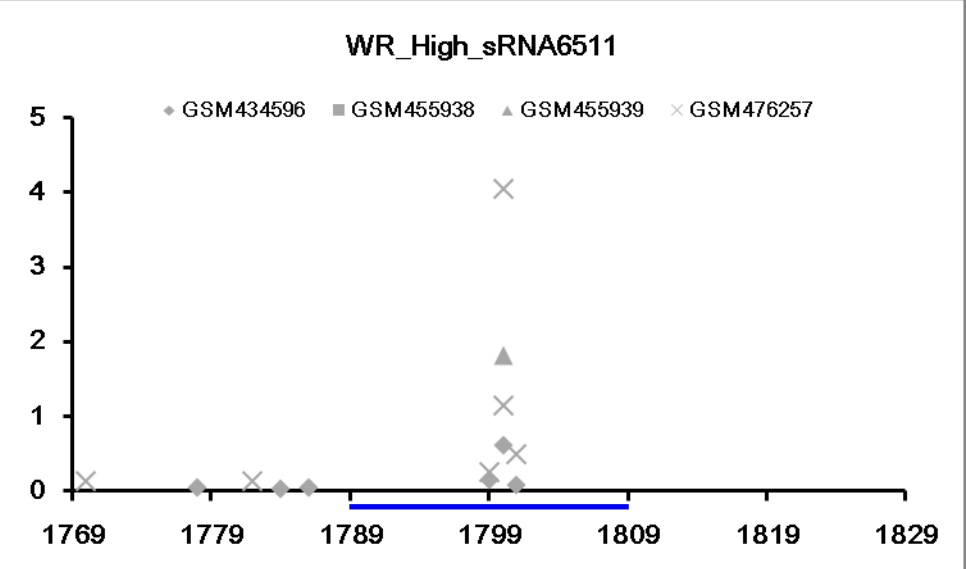

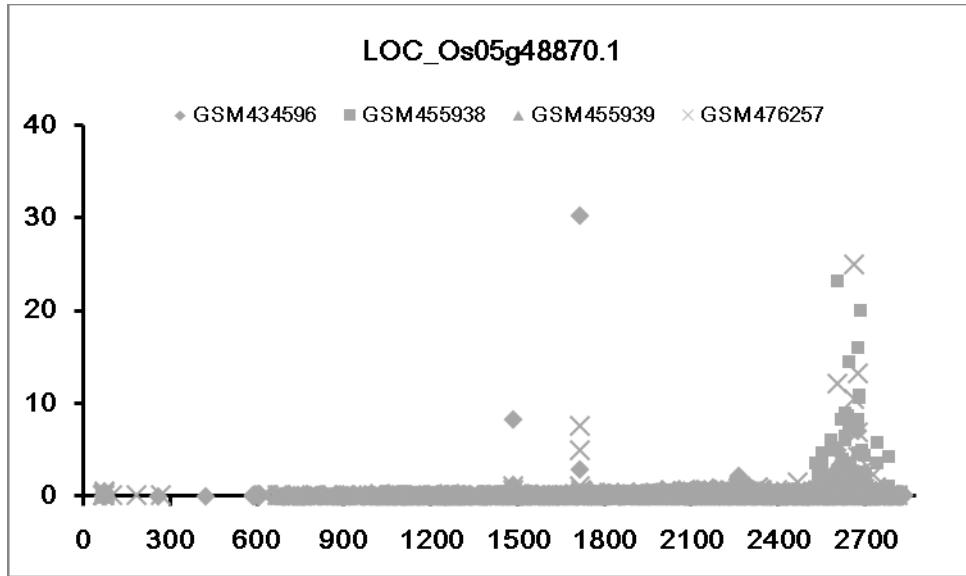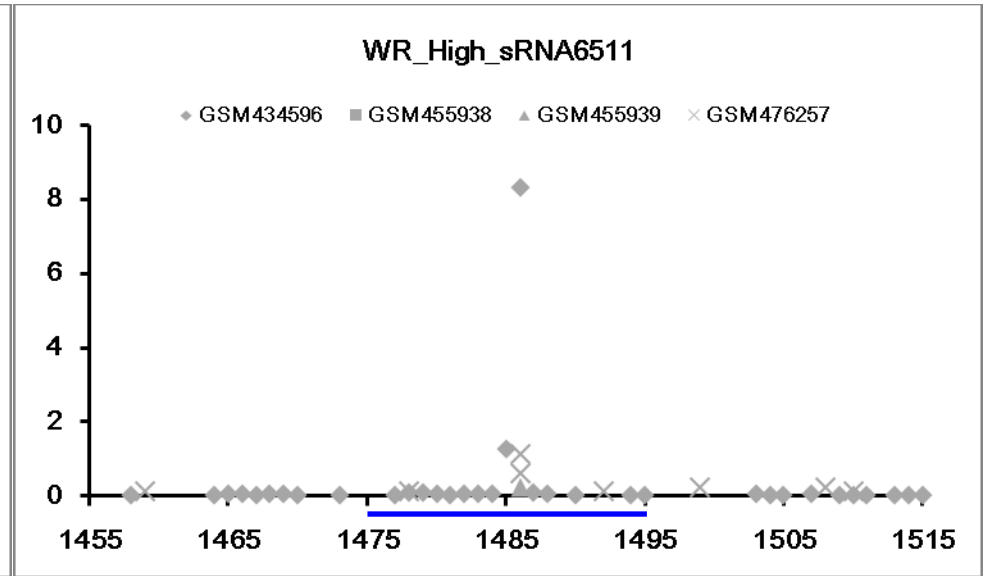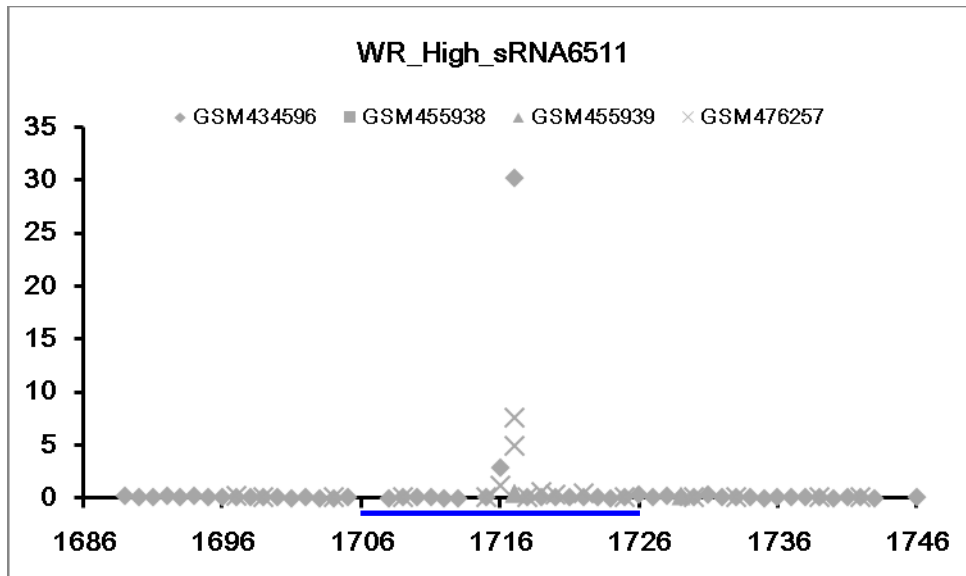

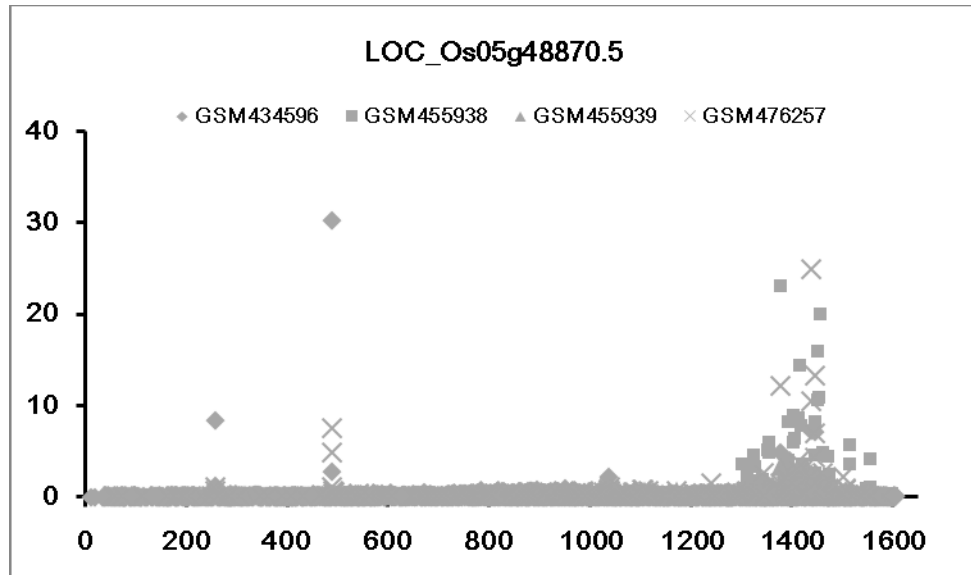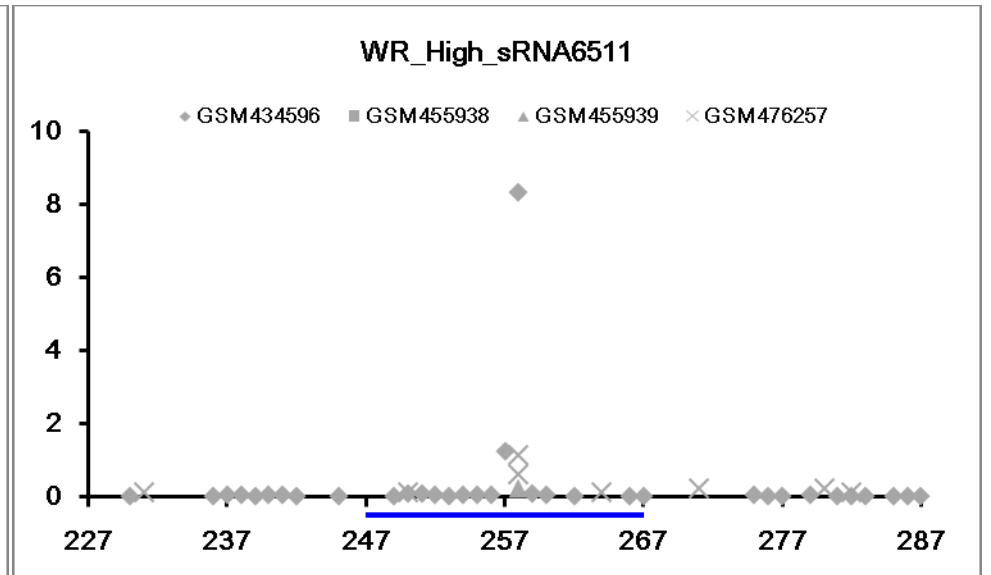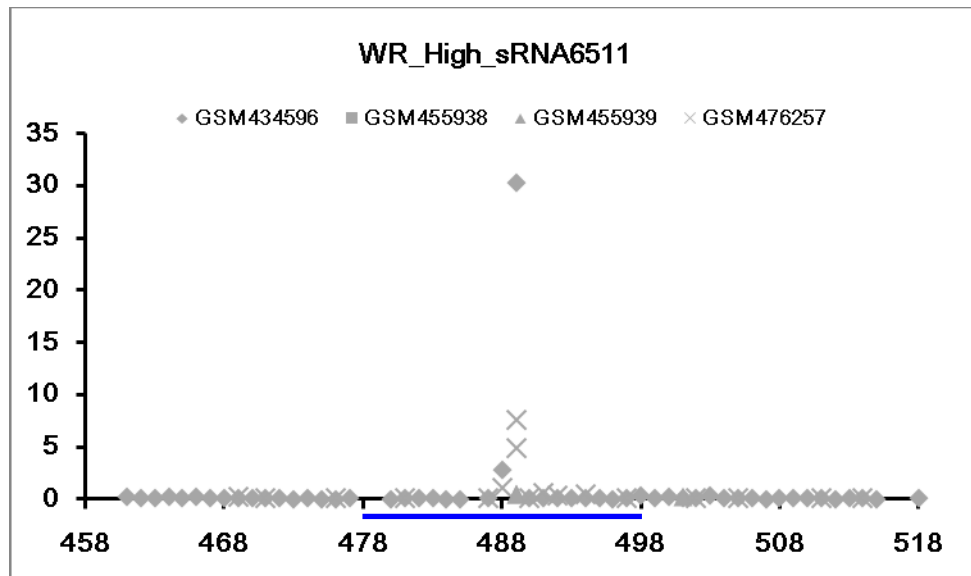



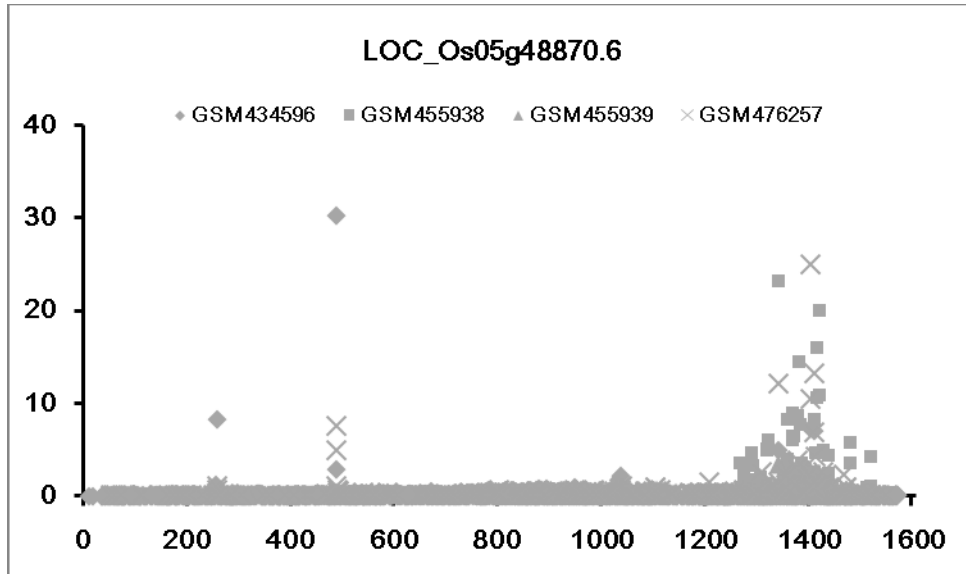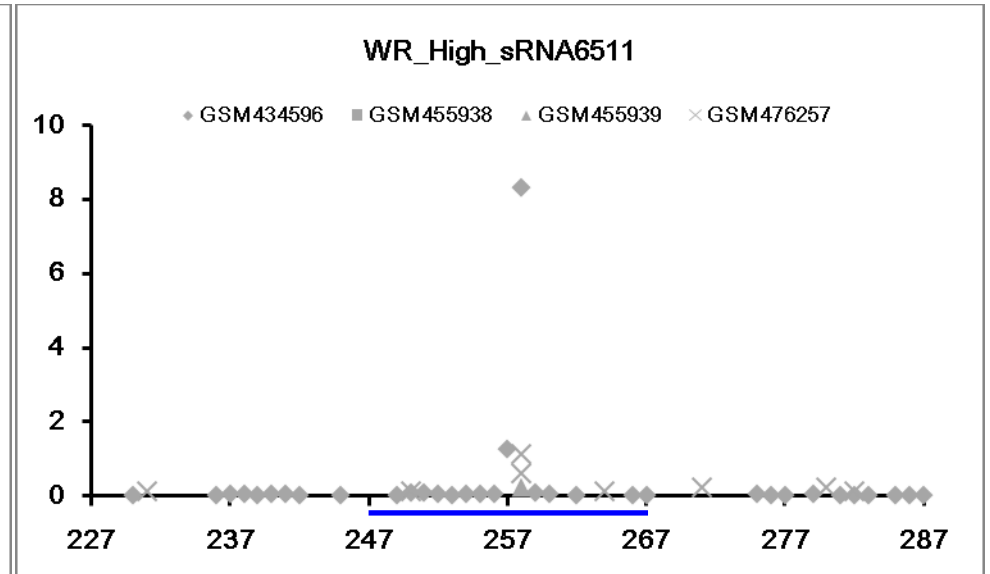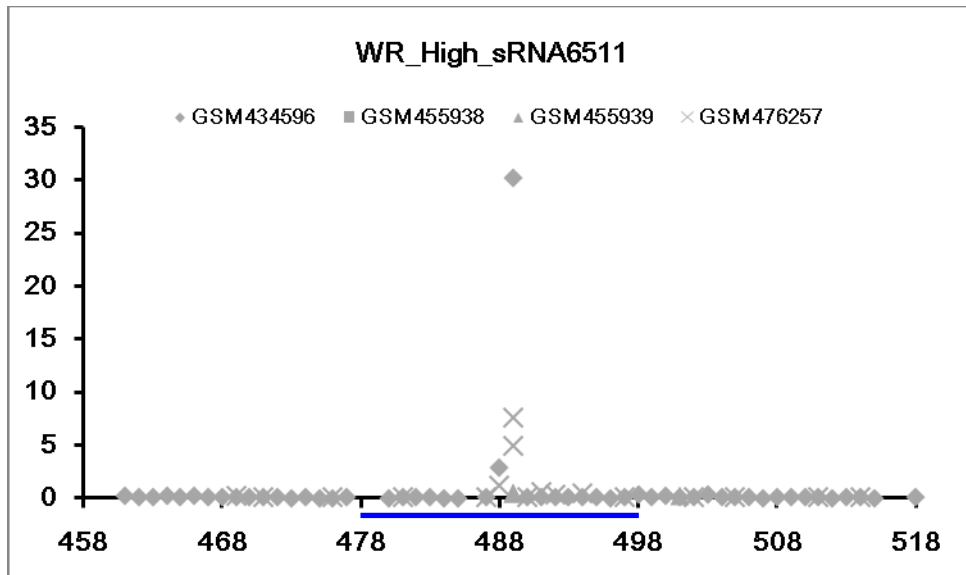

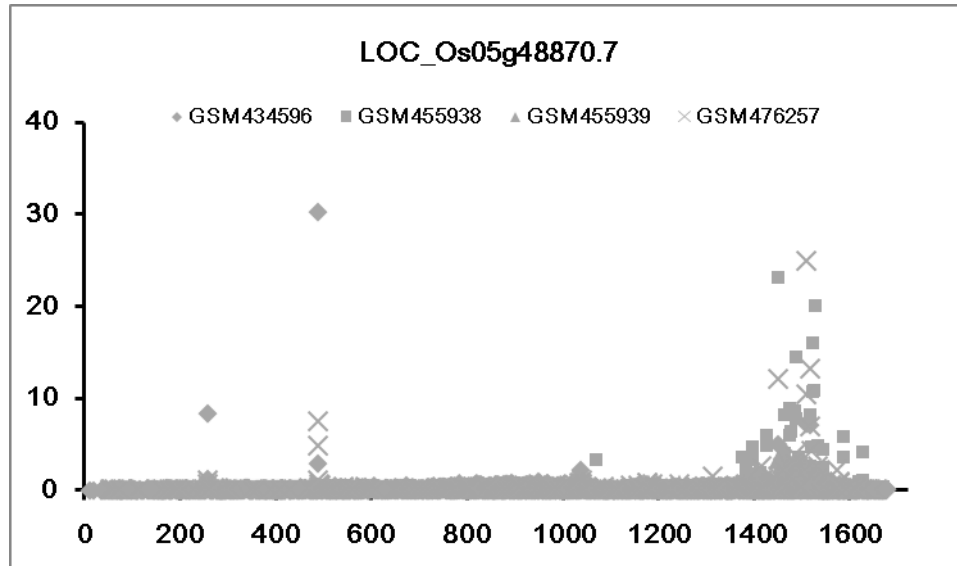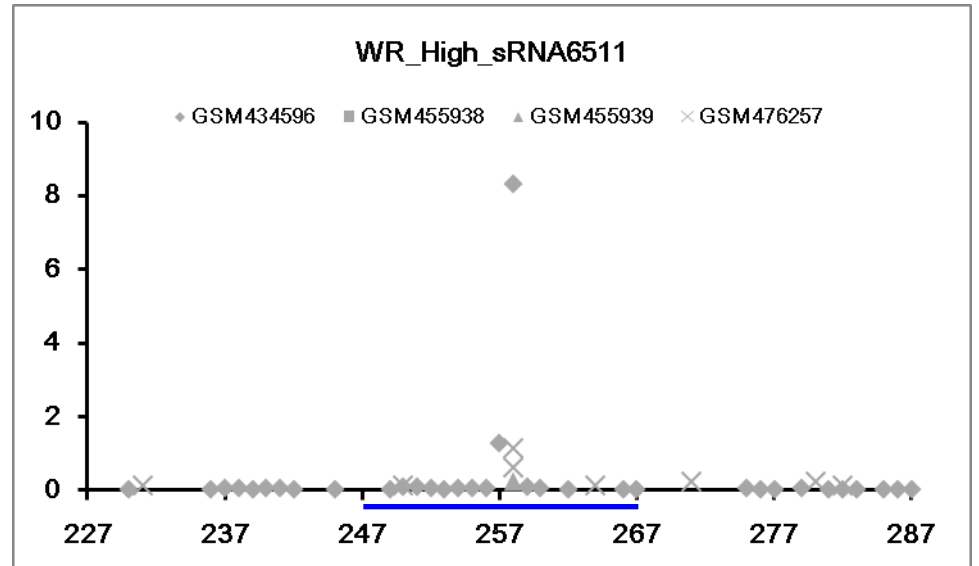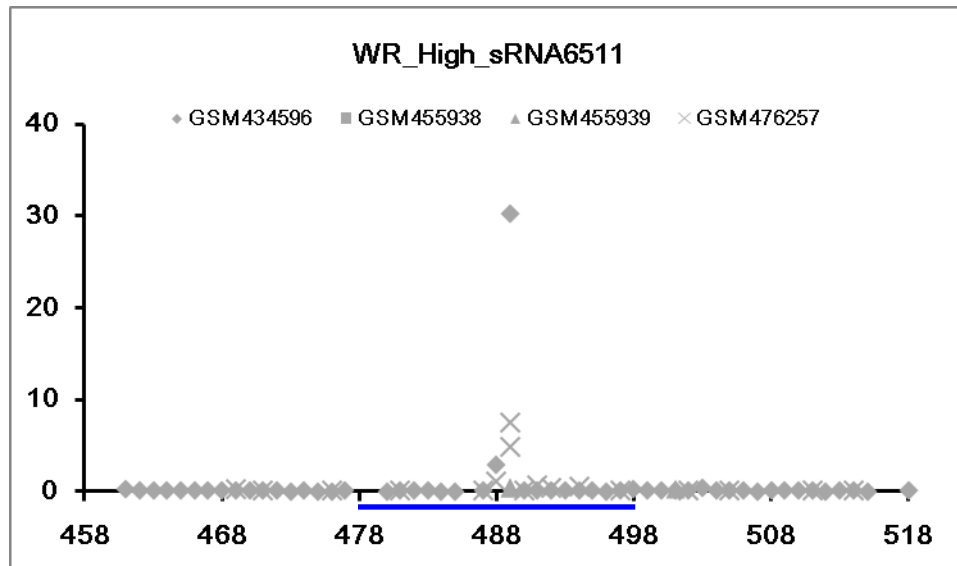

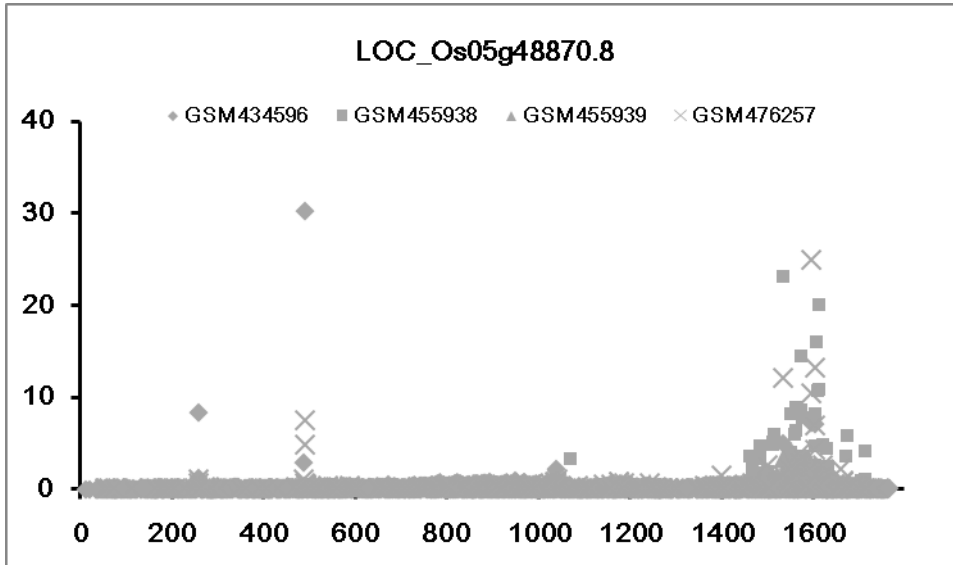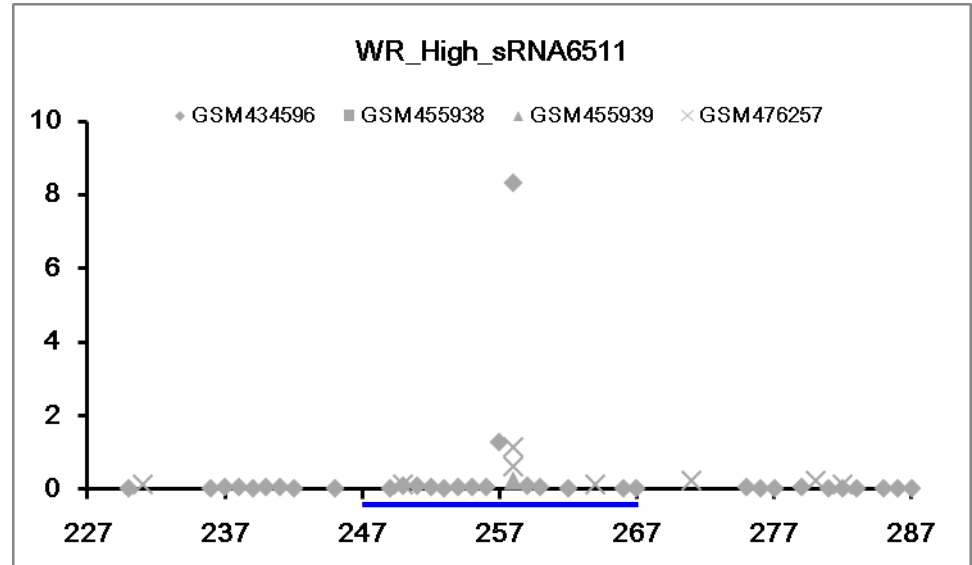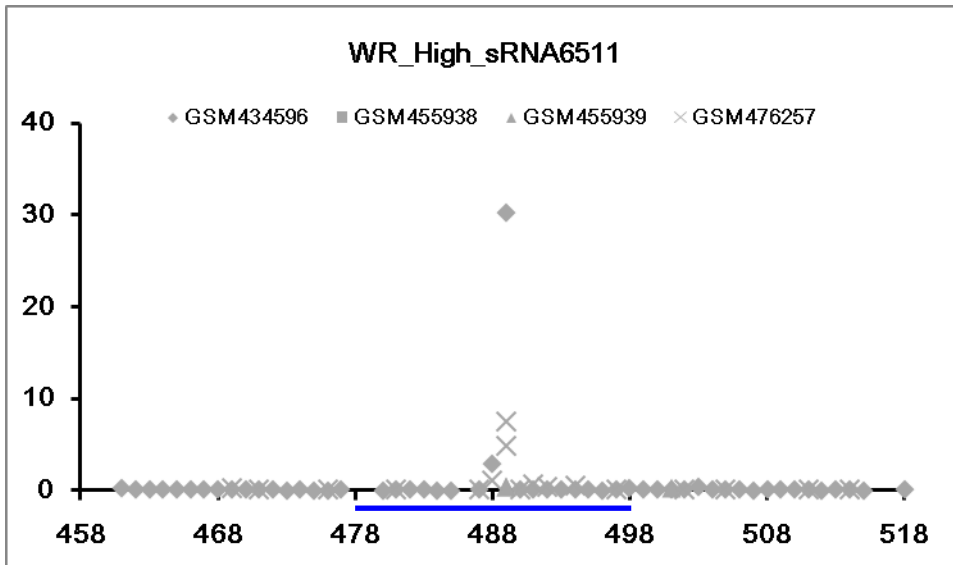

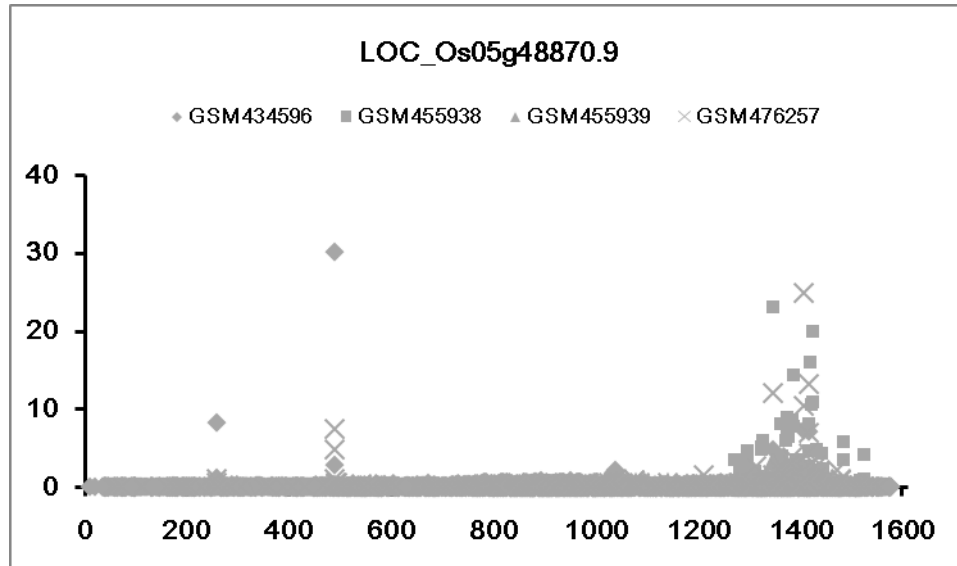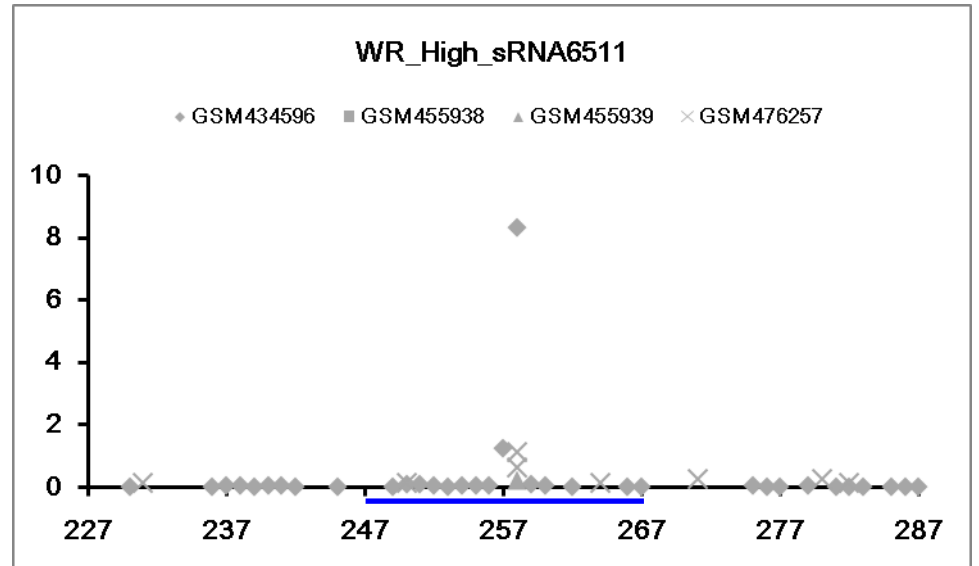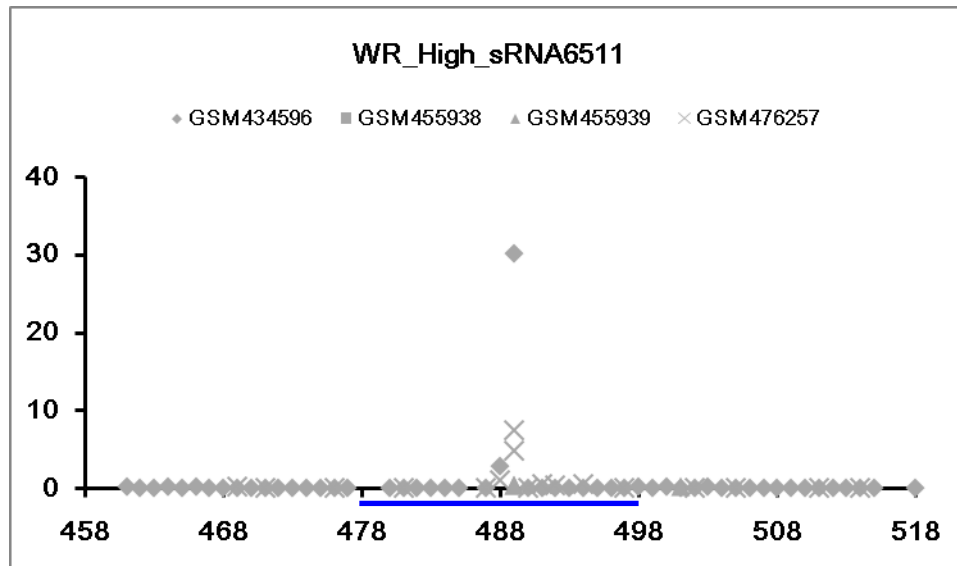

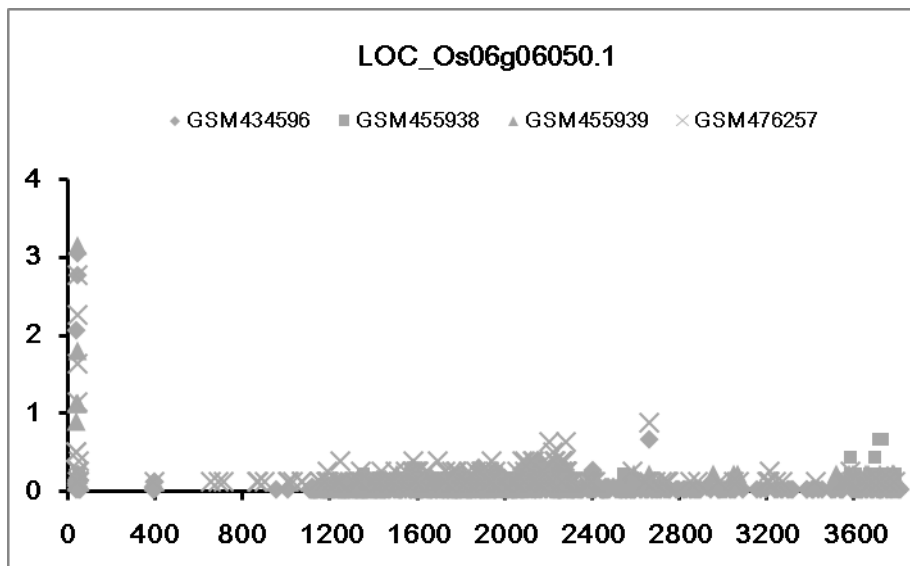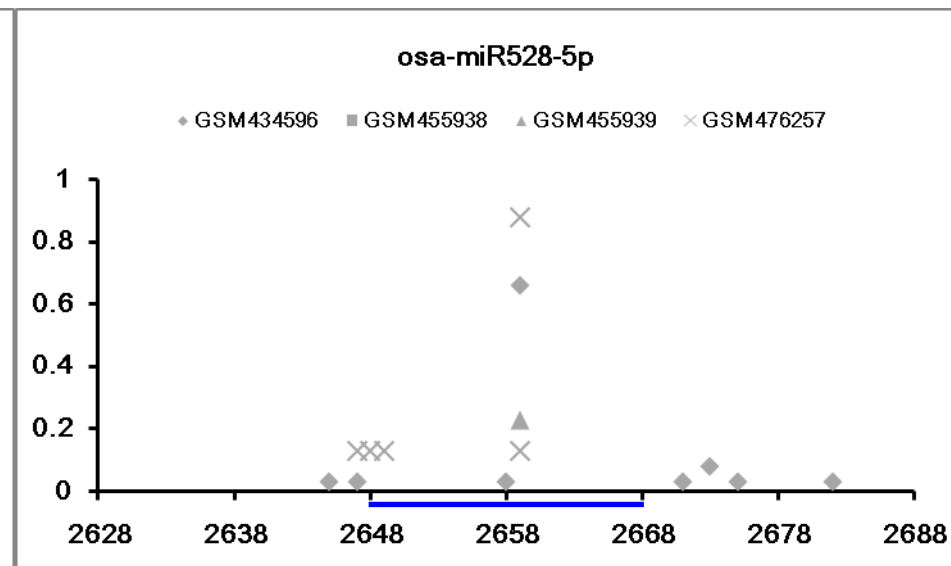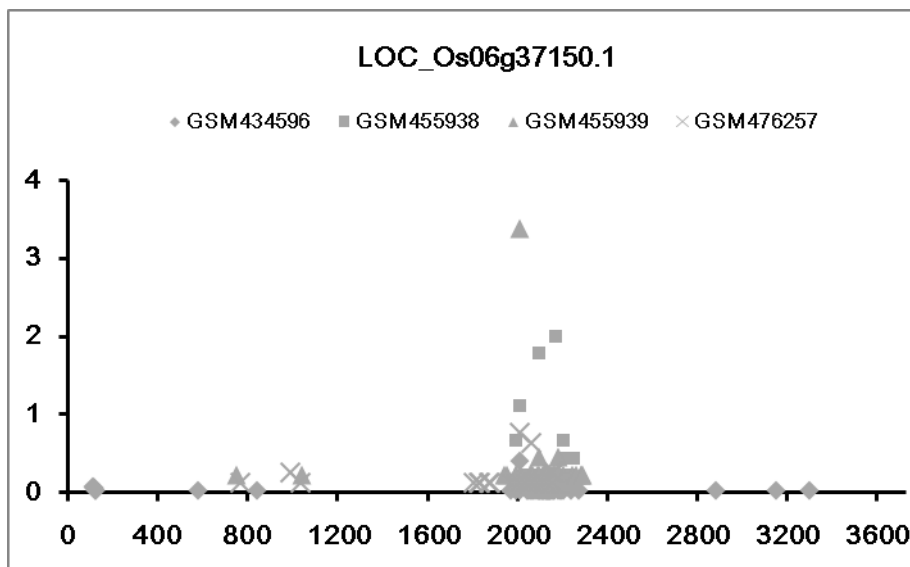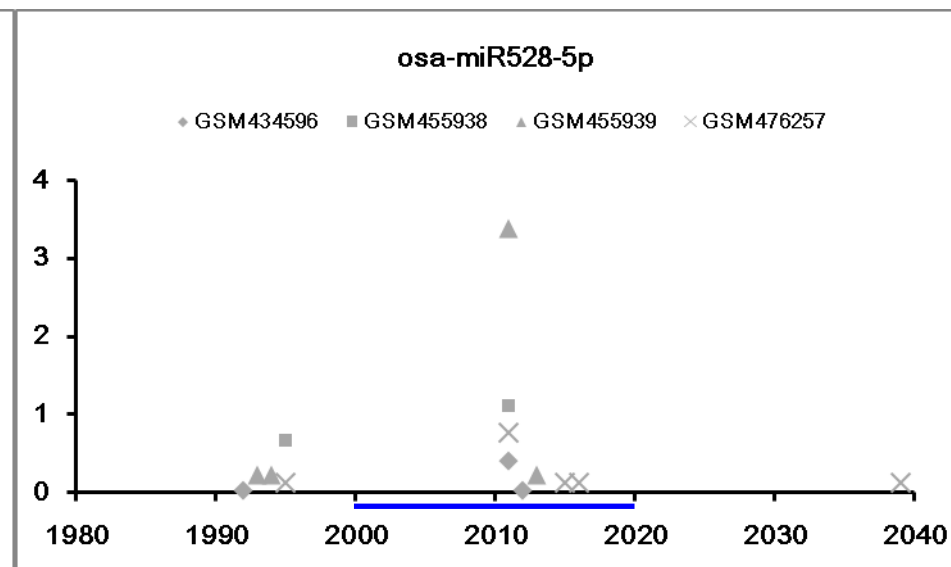

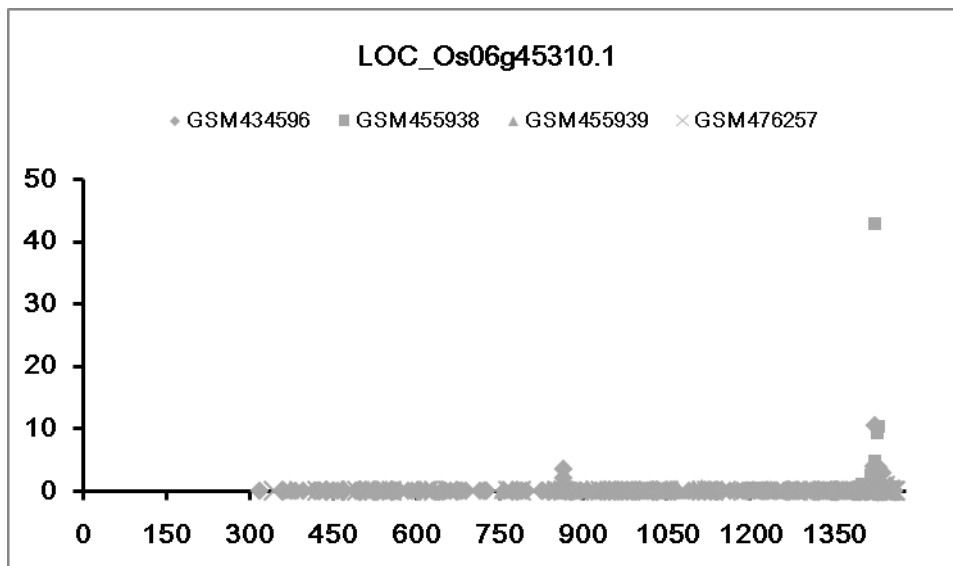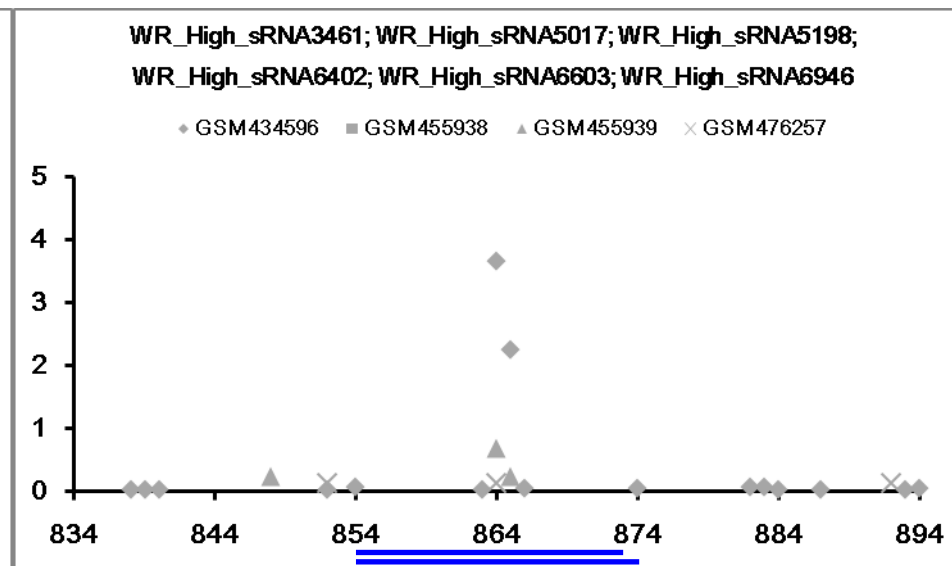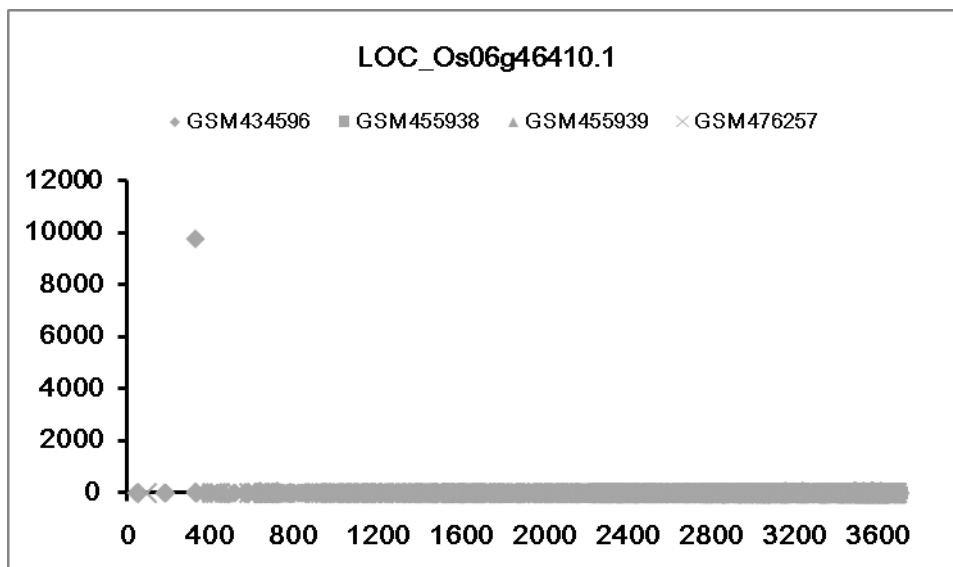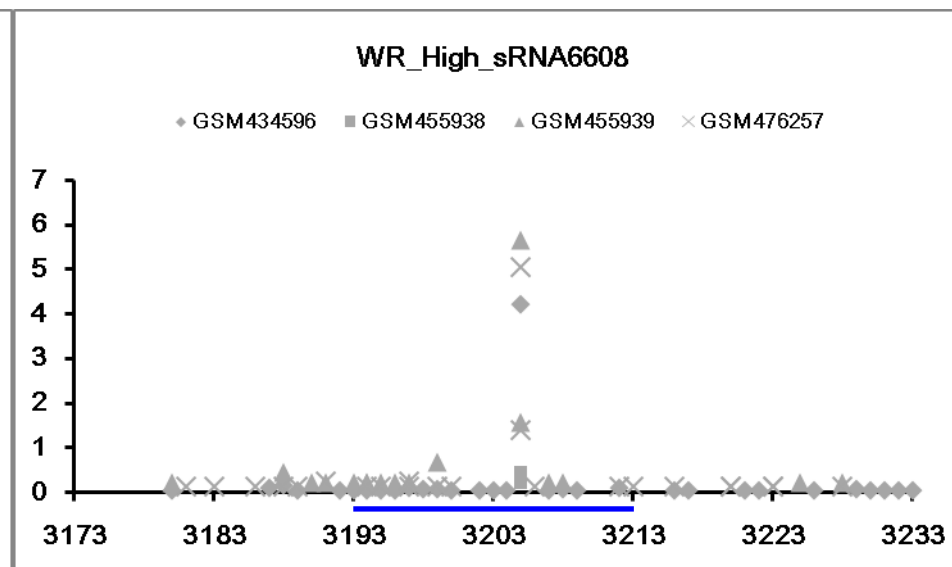

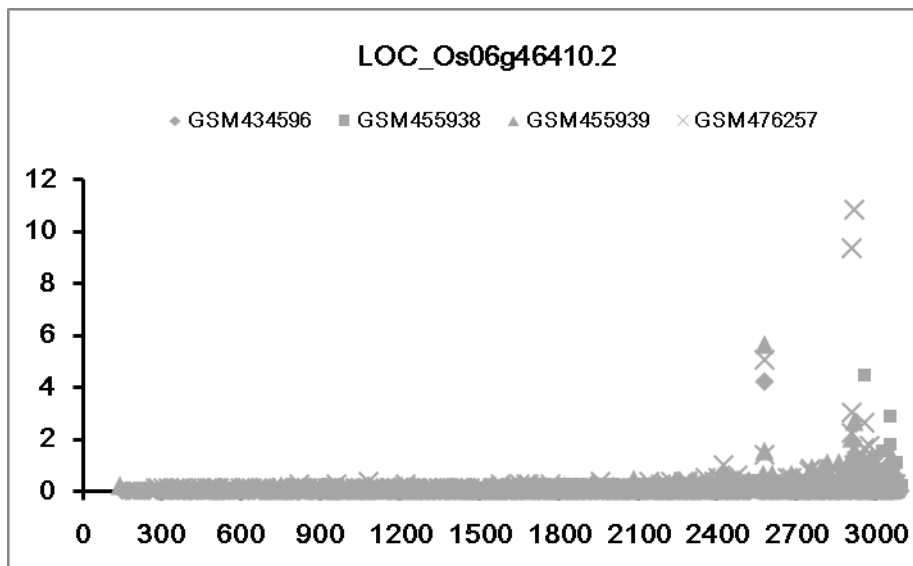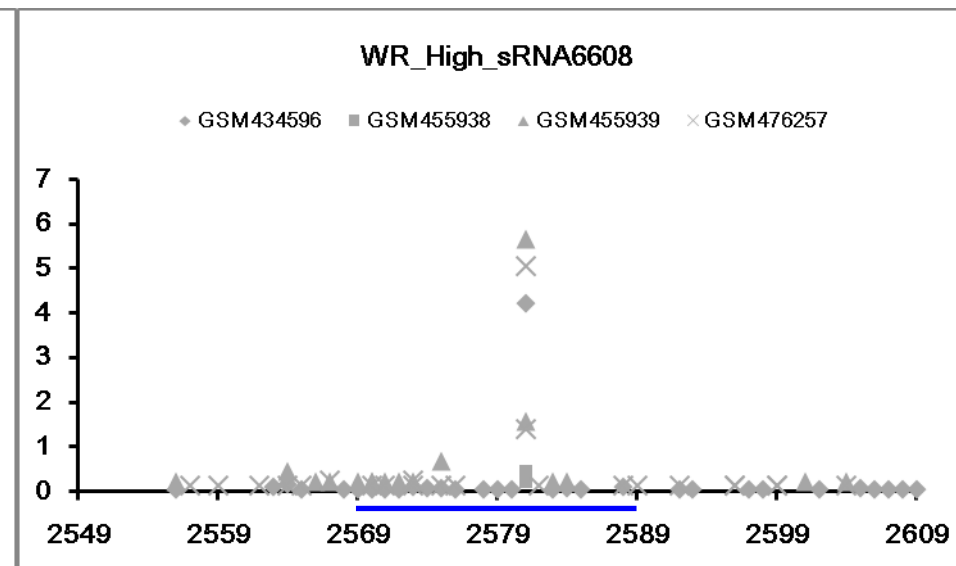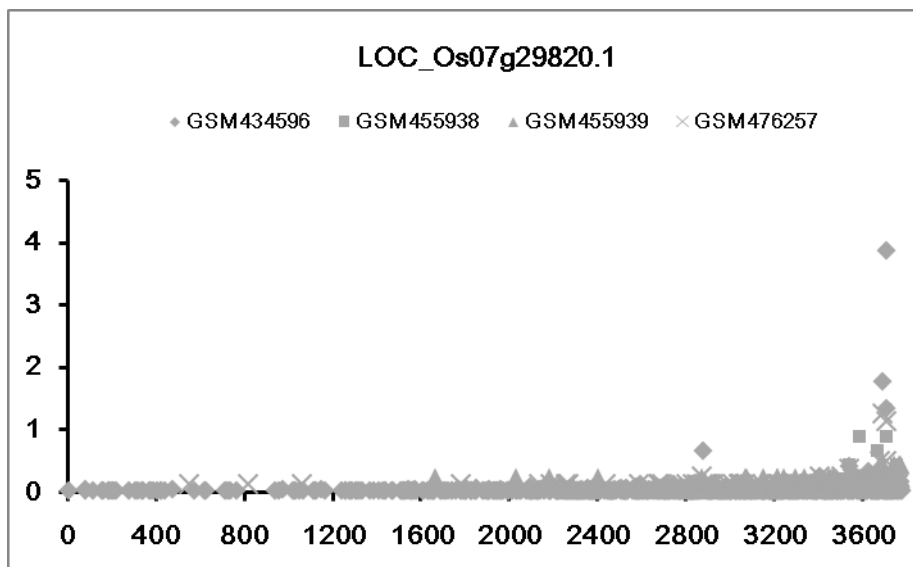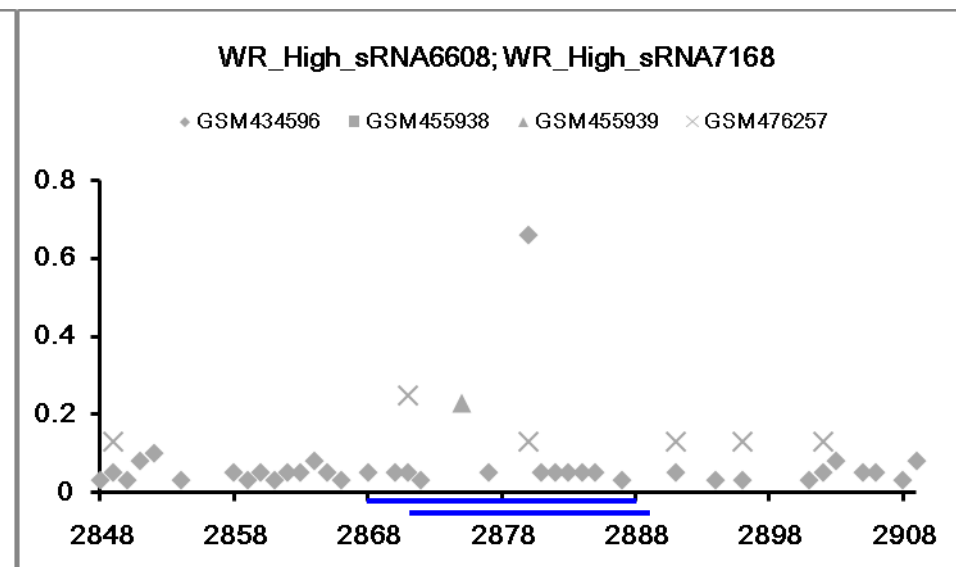

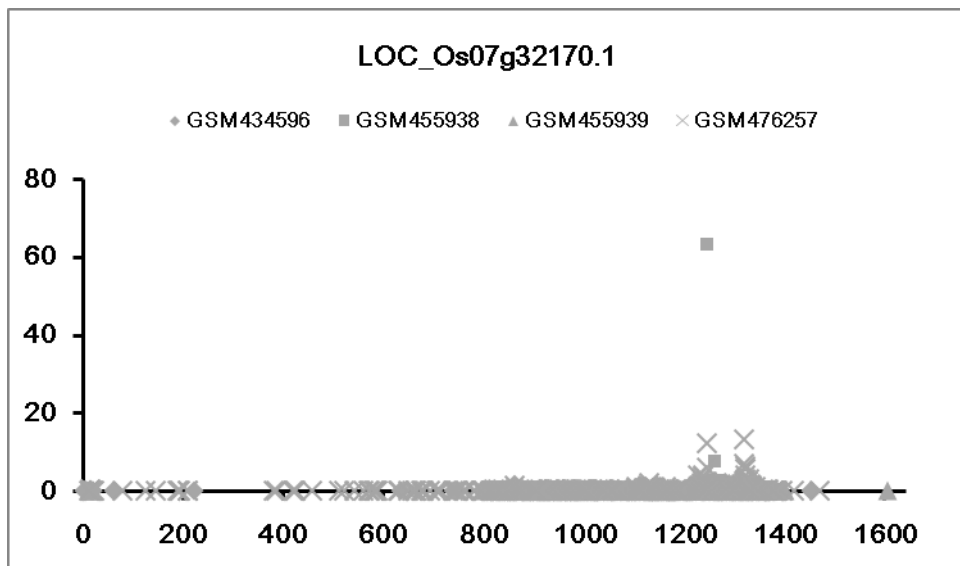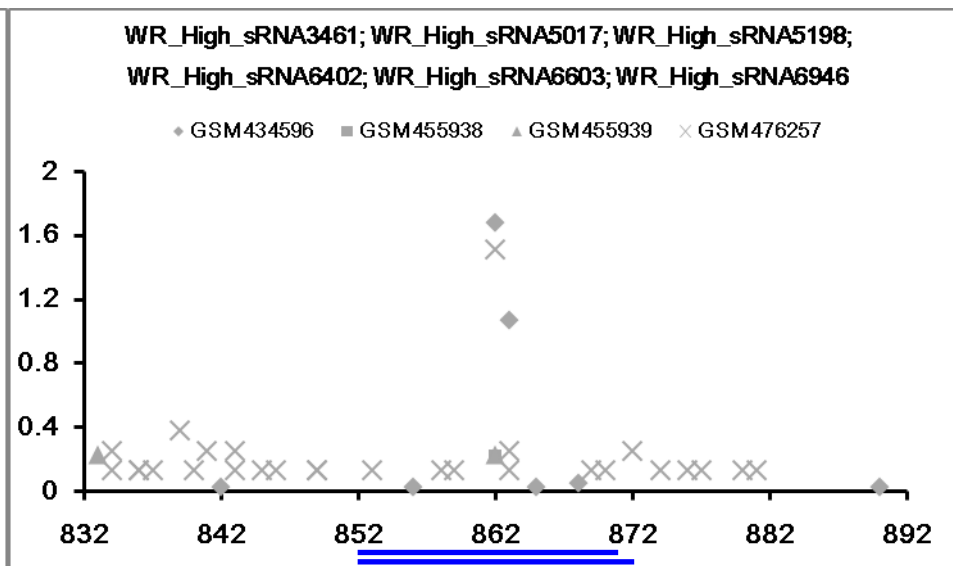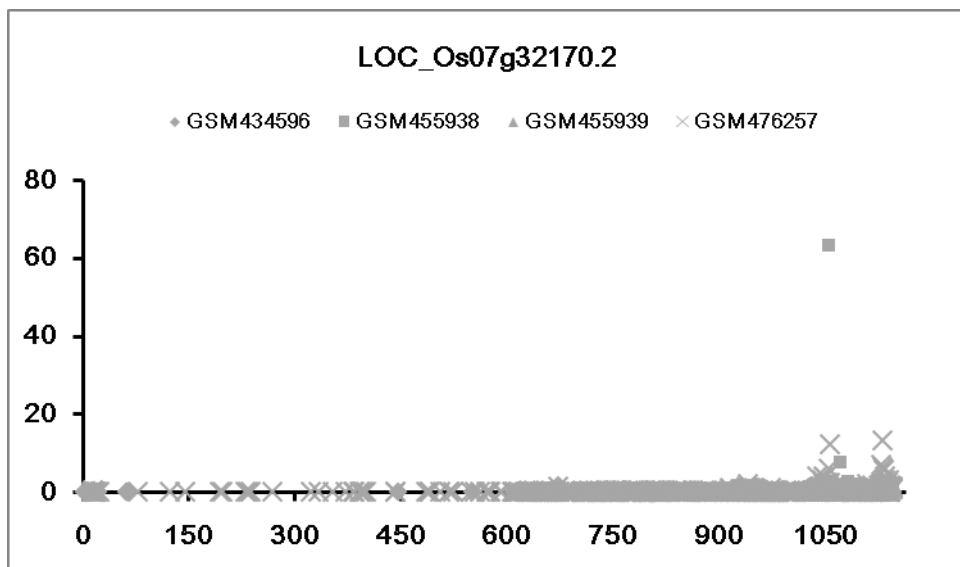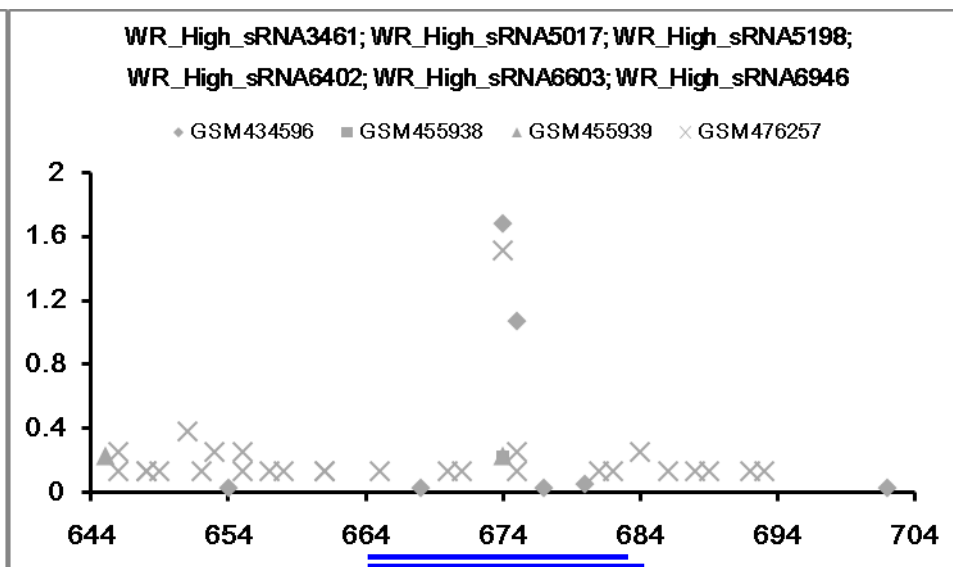



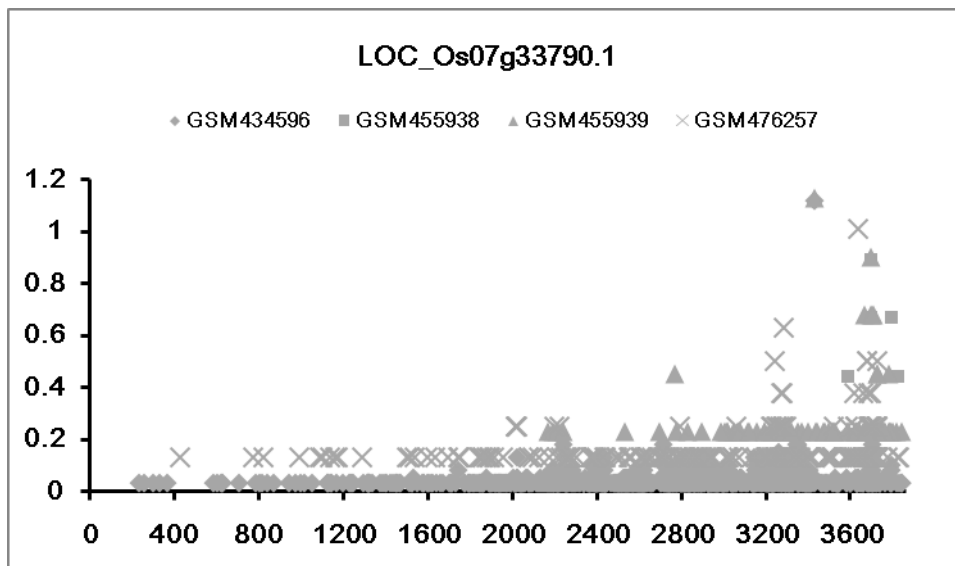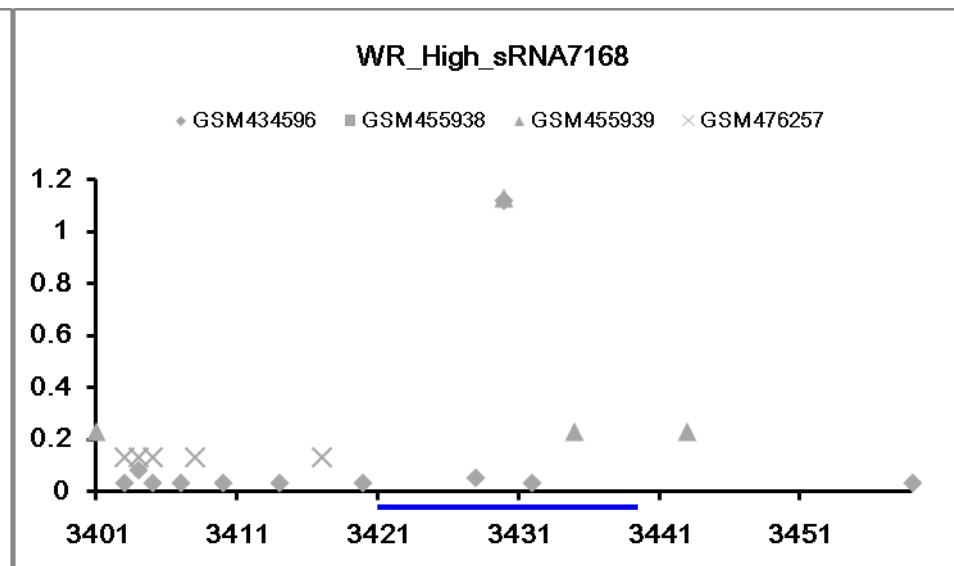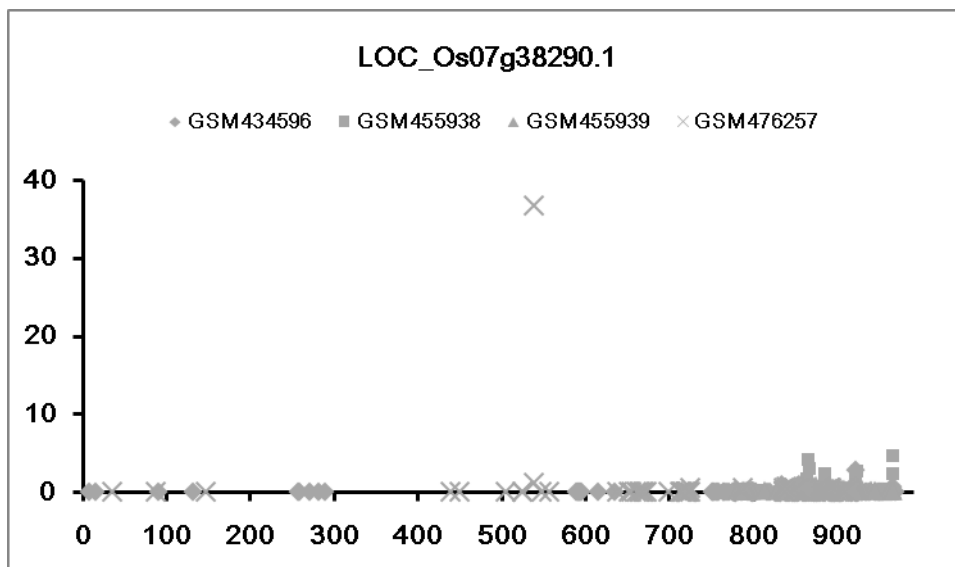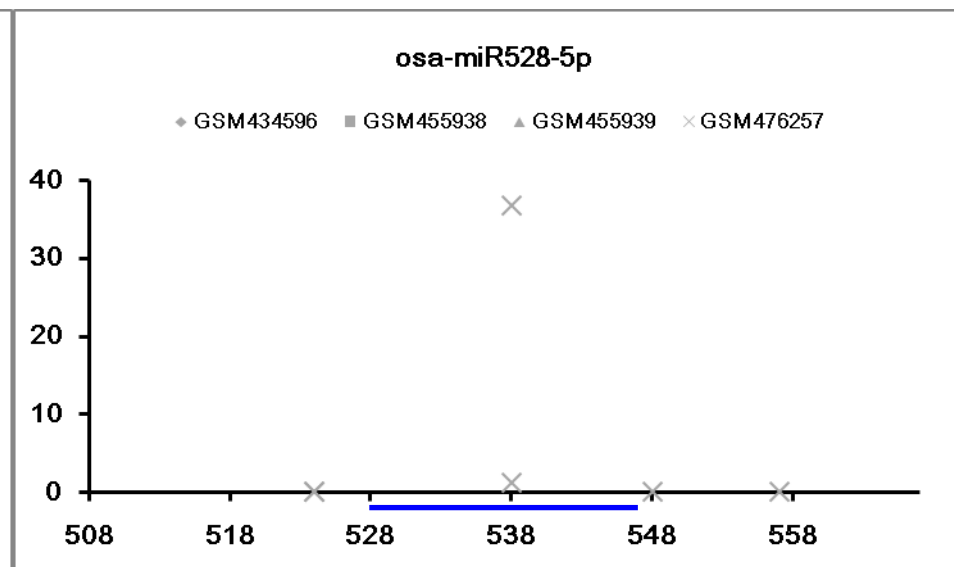

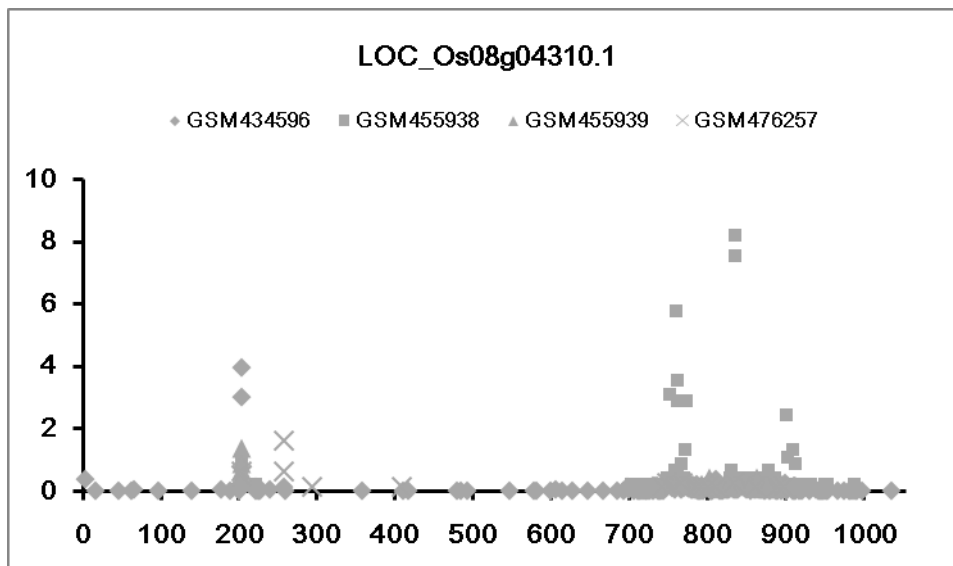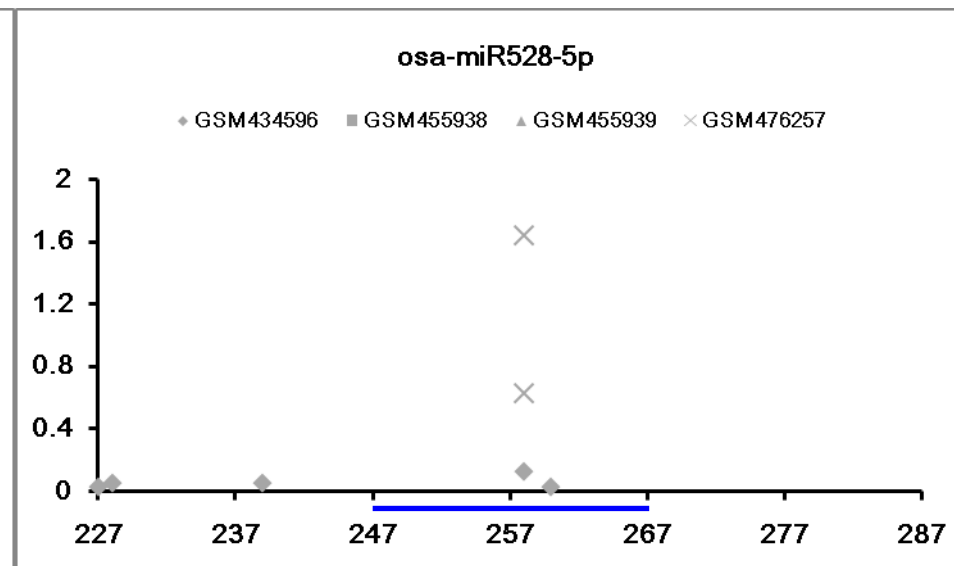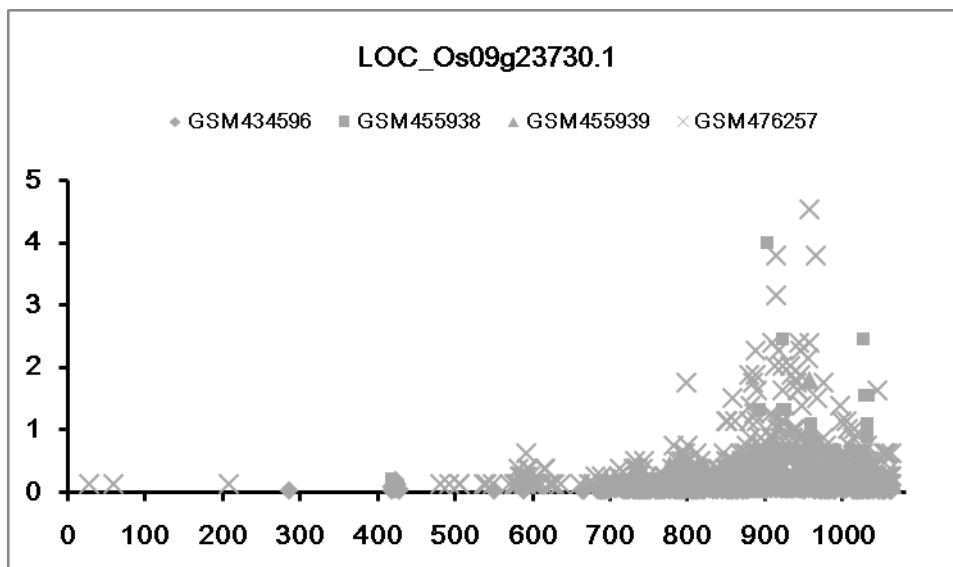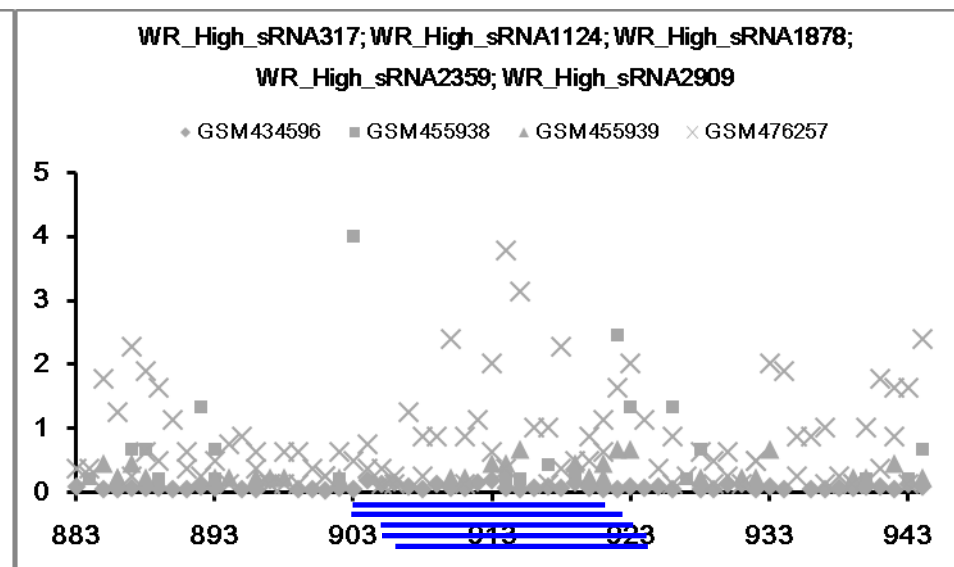

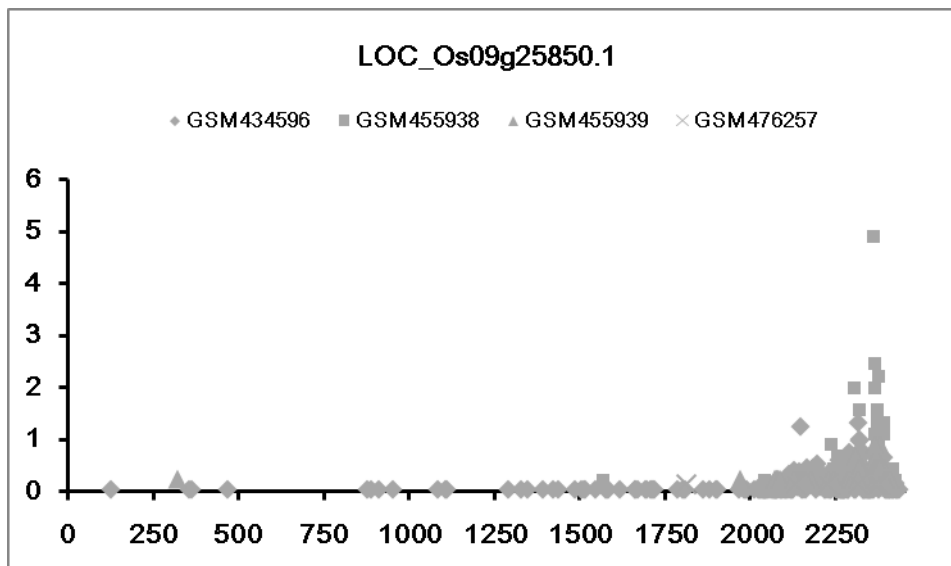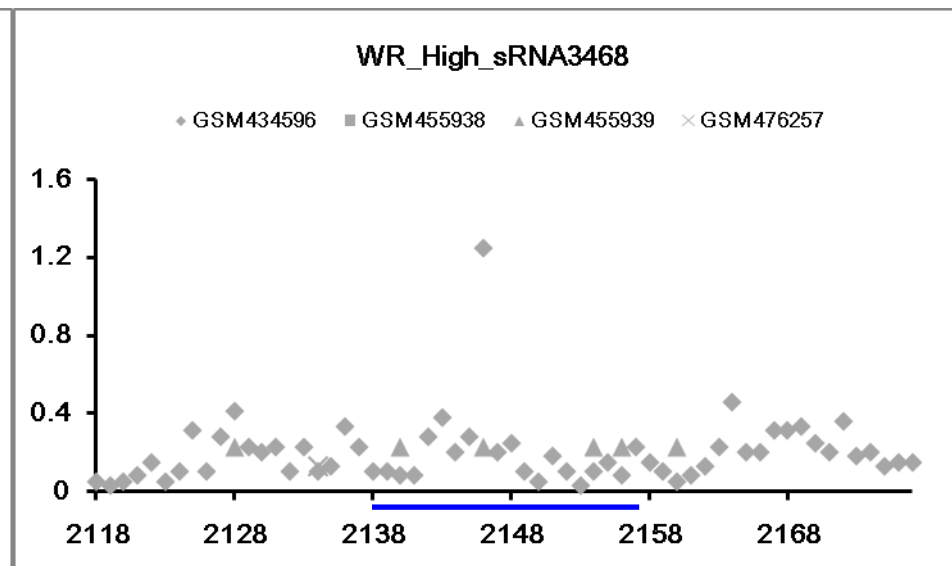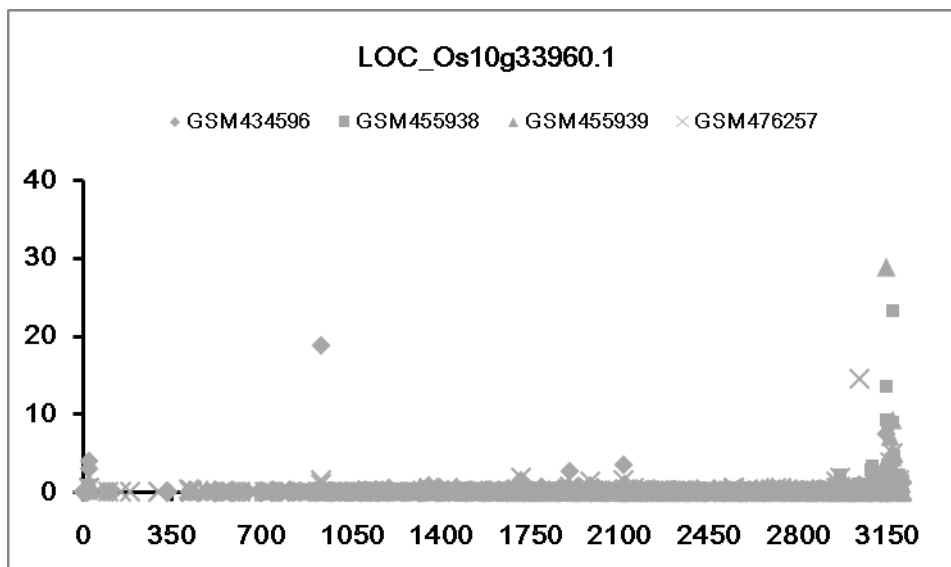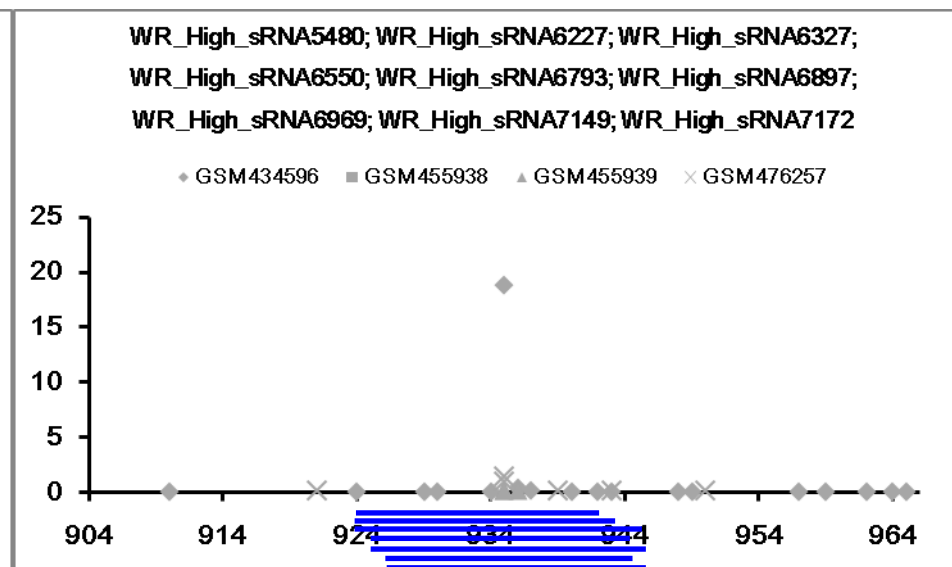

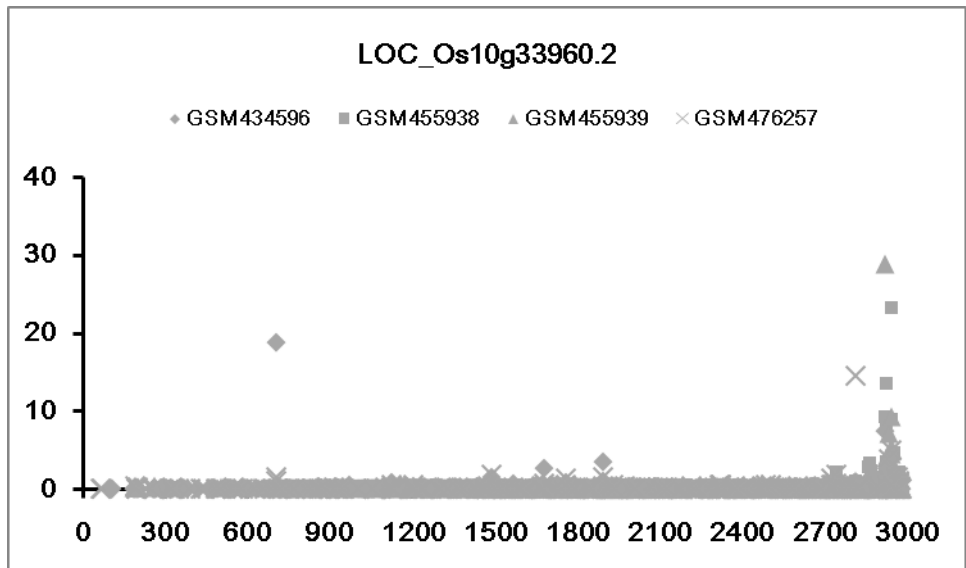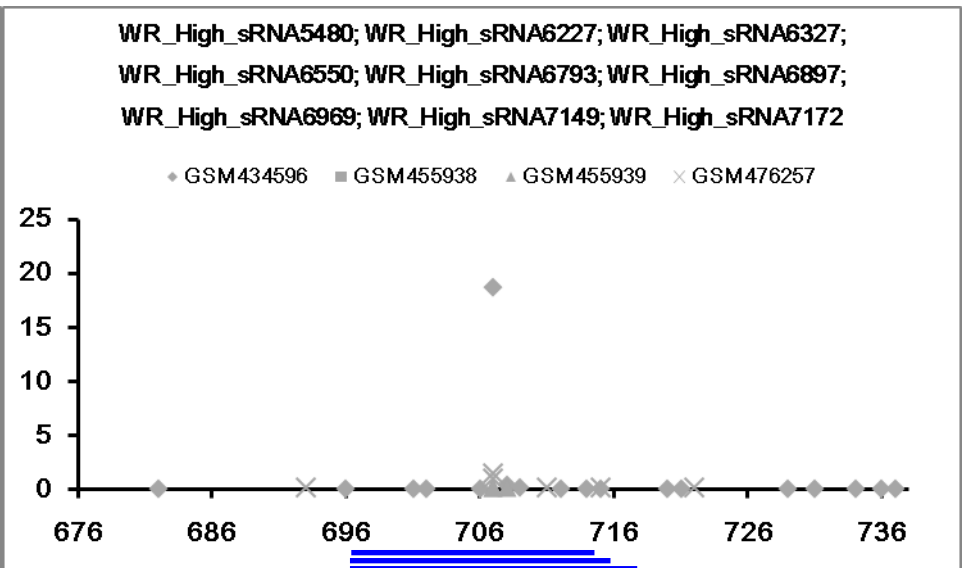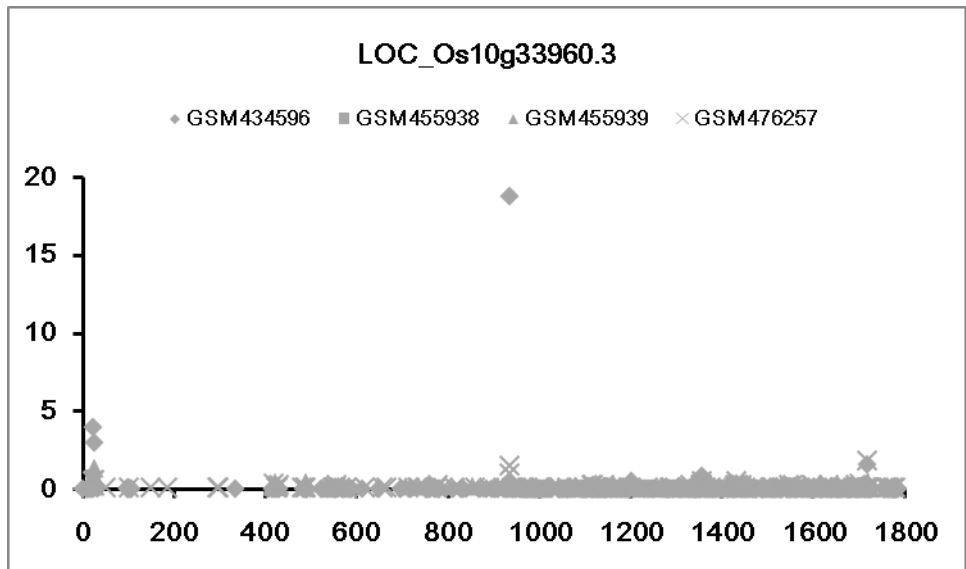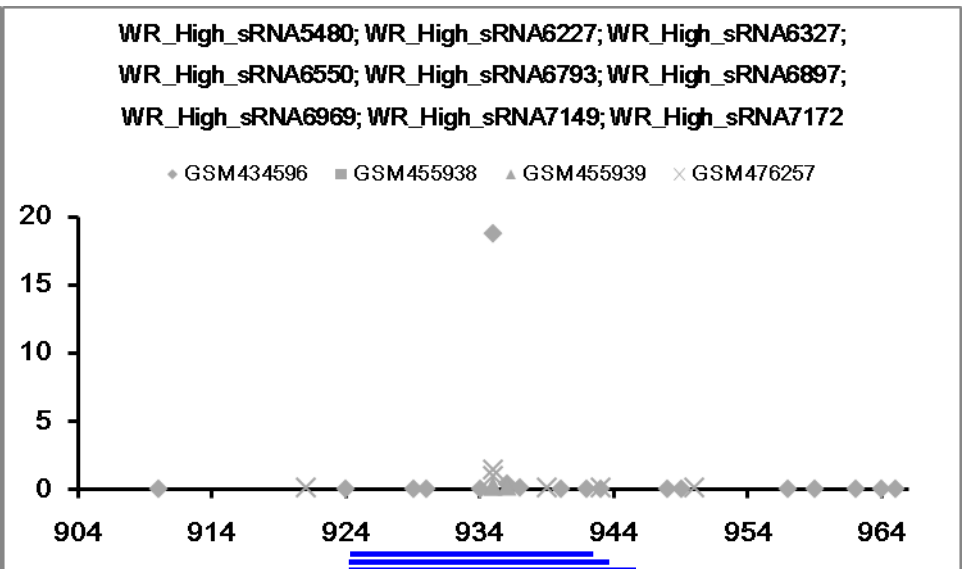

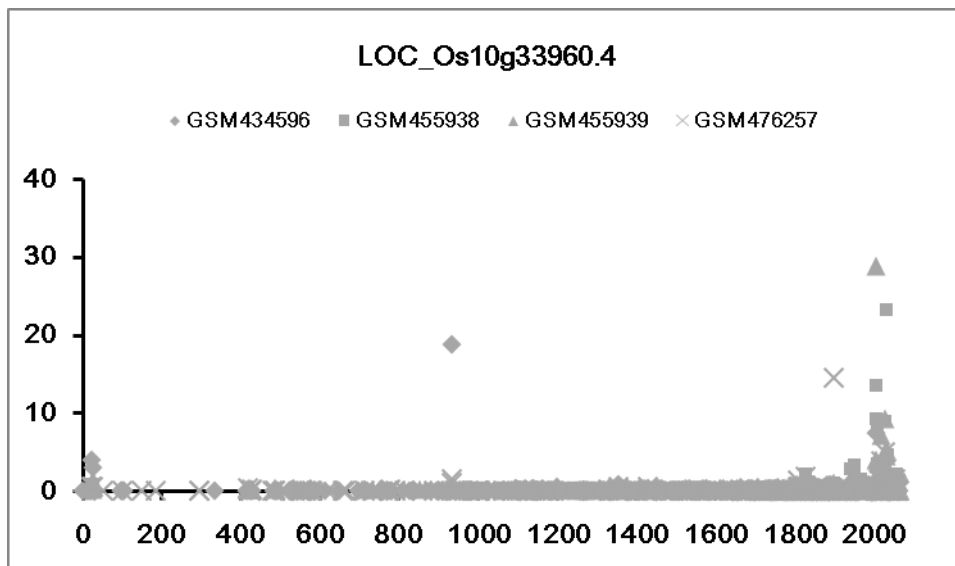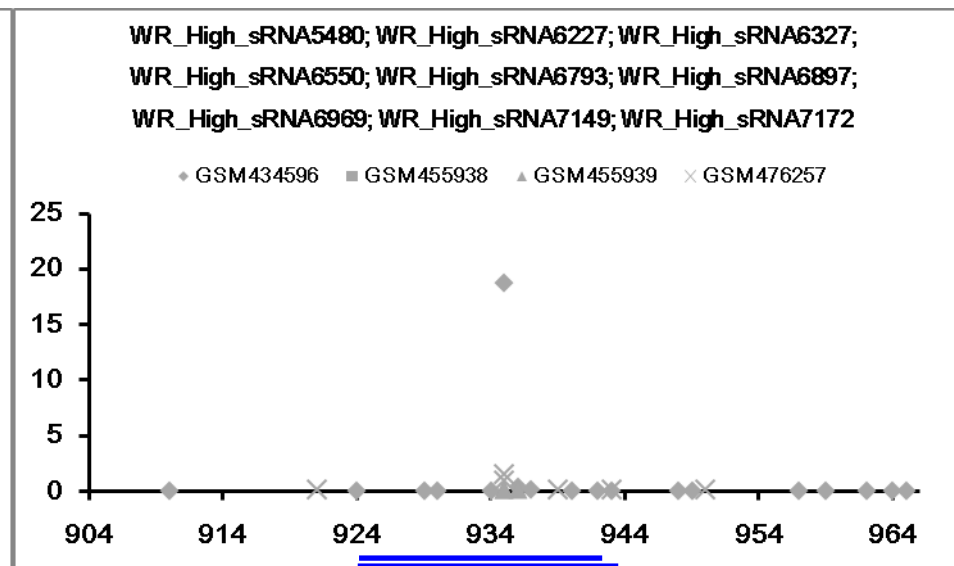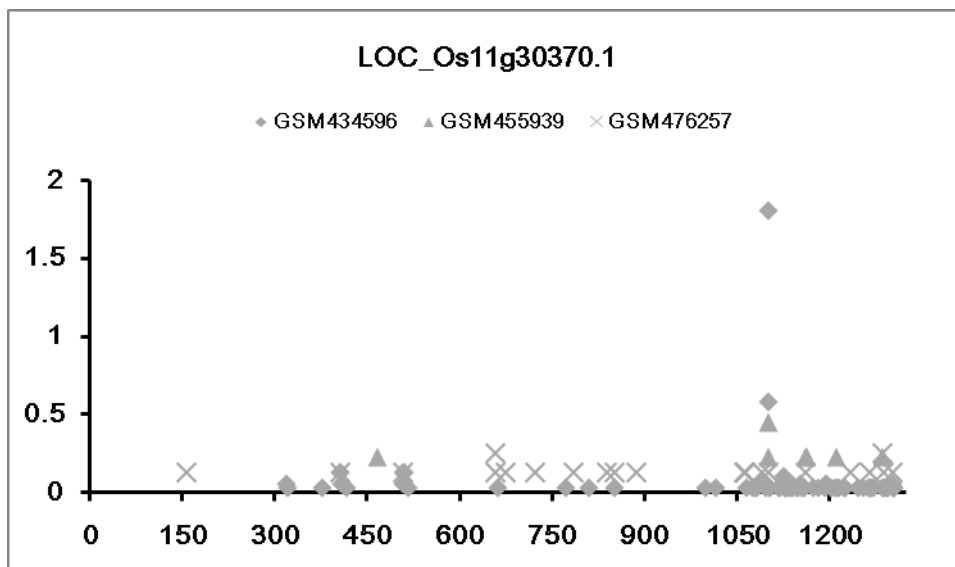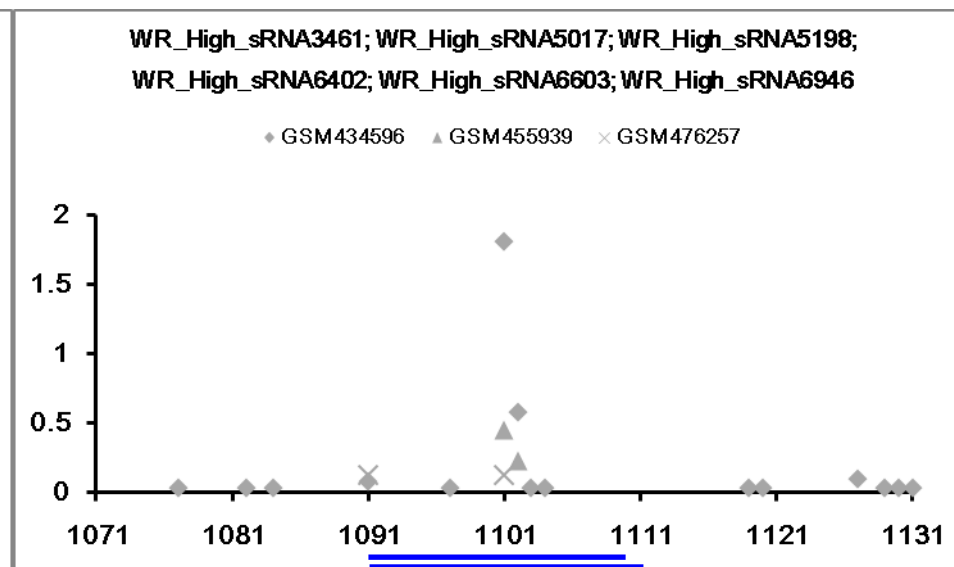

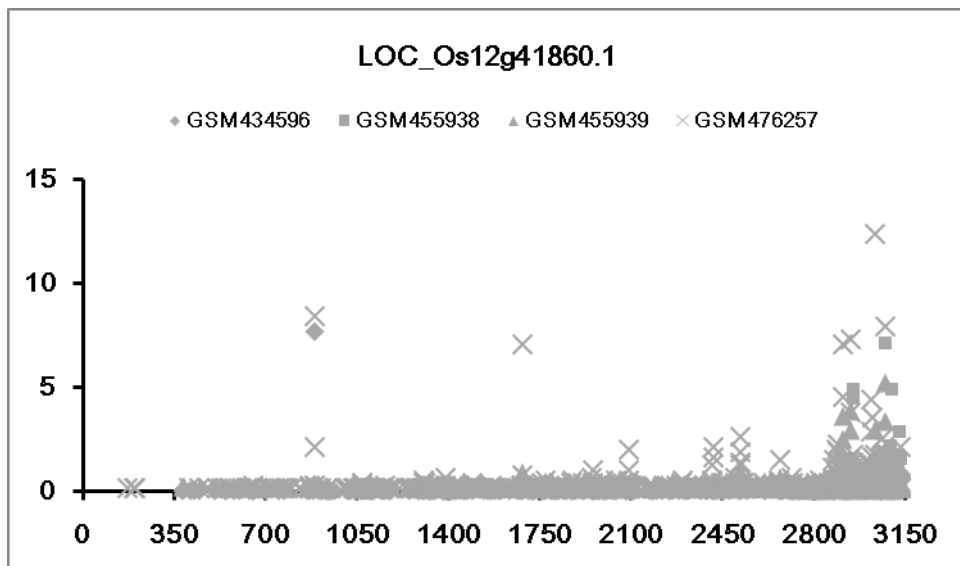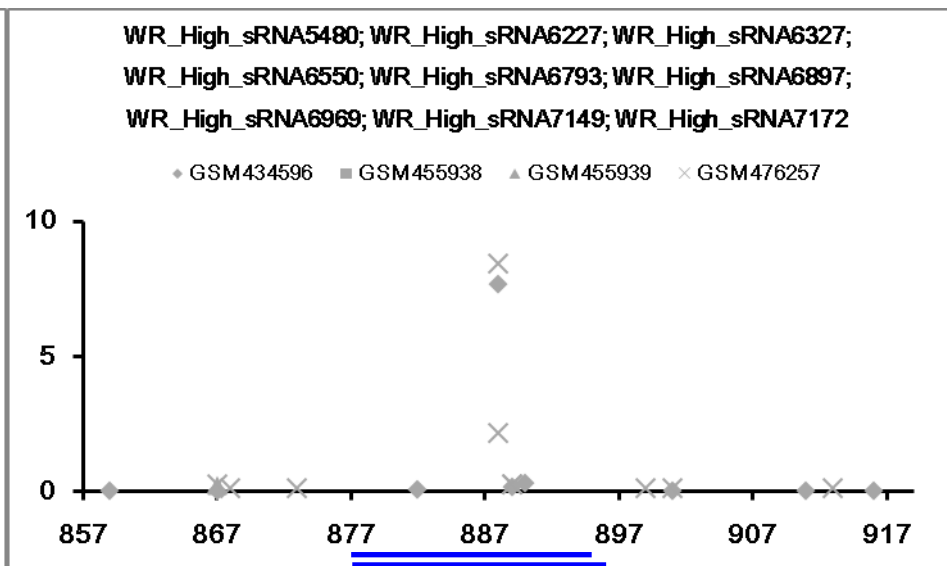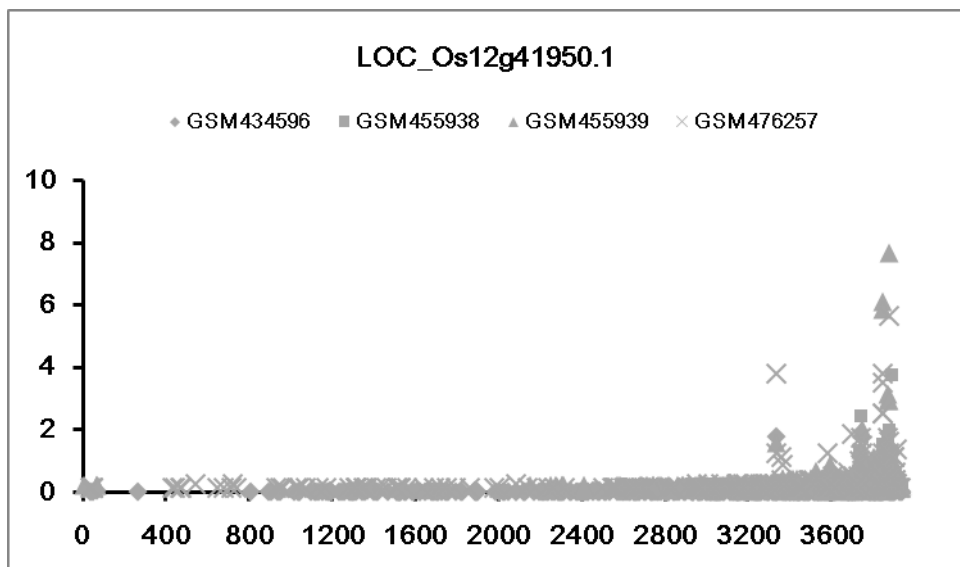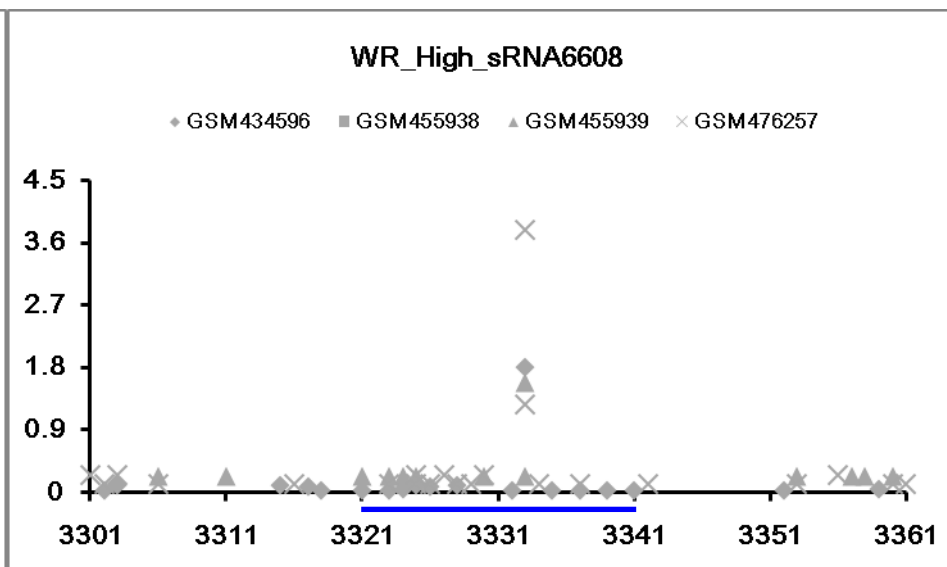

Supplement: 1471-2164-14-510-S6.pdf [file 1471-2164-14-510-S6.pdf]
